**SGLT2 inhibition by intraperitoneal dapagliflozin mitigates peritoneal fibrosis and ultrafiltration failure in a mouse model of chronic peritoneal exposure to high-glucose dialysate**

Michael S. Balzer, M.D.<sup>1</sup>; Song Rong, M.D.<sup>1</sup>; Johannes Nordlohne, Ph.D.<sup>1</sup>;  
Jan D. Zemtsovski<sup>1</sup>; Sonja Schmidt, Ph.D.<sup>2</sup>; Britta Stapel, Ph.D.<sup>3</sup>, Maria Bartosova, Ph.D.<sup>4</sup>;  
Sibylle von Vietinghoff, M.D.<sup>1</sup>; Hermann Haller, M.D.<sup>1</sup>; Claus P. Schmitt, M.D.<sup>4</sup> and  
Nelli Shushakova, Ph.D.<sup>1,2</sup>

<sup>1</sup>*Department of Nephrology and Hypertension, Hannover Medical School, Hannover, Germany*

<sup>2</sup>*Phenos GmbH, Hannover, Germany*

<sup>3</sup>*Department of Psychiatry, Social Psychiatry and Psychotherapy, Hannover Medical School, Hannover, Germany*

<sup>4</sup>*Division of Pediatric Nephrology, Center for Pediatric and Adolescent Medicine, University of Heidelberg, Heidelberg, Germany*

Corresponding author:

Michael S. Balzer, M.D.

Department of Nephrology and Hypertension

Hannover Medical School

Carl-Neuberg-Str. 1, 30625 Hannover, Germany

Phone +49-511-532-6319

Fax +49-511-552-366

Email: balzer.michael@mh-hannover.de

Running title: SGLT2 inhibition in peritoneal dialysis

Abstract word count: 193

Main body (incl. abstract) word count: 4741

1 **AUTHORSHIP STATEMENT**

2 MSB and NS conceived the research design and had full access to the data; MSB, SR, JN,  
3 JDZ, BS, MB, SvV, SS, HH, CPS and NS performed the experiments or were involved in  
4 data acquisition; MSB, MB, SvV, CPS and NS analyzed the data; MSB wrote the original  
5 version of the manuscript, all authors participated in the review and editing of the manuscript.

6

7 **DISCLOSURE**

8 The authors declare no conflicts of interest. The results presented in this paper have not been  
9 published previously in whole or part, except in abstract format.

10

11 **ACKNOWLEDGEMENT**

12 We are grateful to Professor R. Lichtinghagen (Institute of Clinical Chemistry, Hannover  
13 Medical School) and Mrs. H. Chlebusch (Department of Nephrology and Hypertension,  
14 Hannover Medical School) for technical assistance with serum and urine measurements, to  
15 Professor E. Herpel and Mrs. B. Walter (Tissue Bank of the National Center for Tumor  
16 Diseases, NCT, Heidelberg and Institute of Pathology, Heidelberg University Hospital) for  
17 technical assistance with microvessel density measurements.

18

19 **FUNDING**

20 This research was supported by grants to MSB from the German Research Foundation  
21 (Deutsche Forschungsgemeinschaft, DFG) (Ba 6205/1-1) and Hannover Medical School  
22 (intramural excellence program 'HiLF'). MB is funded by the German Research Foundation  
23 (DFG 419826430). CPS has obtained funding from the European Union's Horizon 2020  
24 Research and Innovation Program IMPROVE-PD under the Marie Skłodowska-Curie grant  
25 agreement number 812699 and from European Nephrology and Dialysis Institute (ENDI).

26

27 **KEYWORDS**

28 Peritoneal dialysis (PD), sodium-dependent glucose transport, SGLT inhibition, dapagliflozin,  
29 peritoneum, mesothelial cell, macrophage.

30 **ABSTRACT**

31 Peritoneal dialysis (PD) is limited by glucose-mediated peritoneal membrane (PM) fibrosis,  
32 angiogenesis and ultrafiltration failure. Influencing PM integrity by pharmacologically  
33 targeting sodium-dependent glucose transporter (SGLT)-mediated glucose uptake has not  
34 been studied. In this study wildtype C57Bl/6N mice were treated with high-glucose dialysate  
35 via an intraperitoneal catheter, with or without addition of selective SGLT2 inhibitor  
36 dapagliflozin. PM structural changes, ultrafiltration capacity and PET status for glucose, urea  
37 and creatinine were analyzed. Expression of SGLT and GLUT was analyzed by real-time  
38 PCR, immunofluorescence and immunohistochemistry. Peritoneal effluents were analyzed for  
39 cellular and cytokine composition. We found that peritoneal SGLT2 was expressed in  
40 mesothelial cells and in skeletal muscle. Dapagliflozin significantly reduced effluent TGF- $\beta$   
41 concentrations, peritoneal thickening and fibrosis as well as microvessel density, resulting in  
42 improved ultrafiltration, despite the fact that it did not affect development of high glucose  
43 transporter status. *In vitro*, dapagliflozin reduced monocyte chemoattractant protein-1 release  
44 under high glucose conditions in human and murine peritoneal mesothelial cells. Pro-  
45 inflammatory cytokine release in macrophages was reduced only when cultured in high  
46 glucose conditions with an additional inflammatory stimulus. In summary, dapagliflozin  
47 improved structural and functional peritoneal health in the context of high glucose PD.

## 48 INTRODUCTION

49 Peritoneal dialysis (PD) as a renal replacement therapy for individuals with end stage renal  
50 disease relies on the peritoneum and its properties as a dialyzer membrane. Glucose-based PD  
51 fluid (PDF) generates an osmotic gradient that promotes water and solute clearance across the  
52 peritoneal membrane. However, glucose-containing PDF is non-physiological and as a result,  
53 in most PD patients structural and functional changes occur over time, resulting in decreased  
54 dialysis efficiency and ultimately technique failure.[1] While our understanding of the  
55 molecular mechanisms of such PD-related structural and functional aberrations of the  
56 peritoneum has grown considerably over the last decades, successful translation of  
57 pathophysiological insights into therapeutic options for peritoneal fibrosis are scarce.[2]

58 High glucose concentrations applied in PD create a diabetic state of the peritoneal  
59 cavity.[3] Mesothelial cells (MC) are the first cells of the peritoneal membrane that get in  
60 contact with glucose-containing PDF. The glucotoxic milieu itself can trigger detrimental  
61 changes in mesothelial cells such as epithelial-to-mesenchymal transition (EMT) and  
62 increased production of pro-inflammatory, pro-fibrotic and pro-angiogenic mediators  
63 promoting leukocyte infiltration, fibrosis and angiogenesis.[4] Although the detrimental  
64 effects of glucose uptake from the peritoneal cavity have received considerable attention in  
65 PD research,[5] studies on glucose transporters at the mesothelial cell level and their  
66 morphological and functional impact in the setting of PD are scarce. Several decades ago,  
67 studies demonstrated expression of sodium-dependent glucose transporter (SGLT)1 at the  
68 apical plasma membrane of human peritoneal mesothelial cells (HPMC).[6] Only recently, the  
69 existence of both SGLT1 and SGLT2 in the peritoneum has been demonstrated in rats.[7]  
70 Given the wealth of recent studies that implicate SGLT2 inhibition with antifibrotic properties  
71 not only in the kidney[8] but also in other organs such as liver[9] and heart,[10] we asked  
72 whether or not SGLT would be a feasible pharmacological target in PD patients in order to  
73 ameliorate structural and functional changes in the peritoneum.

74 To this end, we first confirmed the peritoneal expression of SGLT in mice and in  
75 human peritoneal biopsies. We then intraperitoneally applied the SGLT2 inhibitor  
76 dapagliflozin via a PD catheter-based chronic PDF exposure model to mice and evaluated its  
77 effects on peritoneal structure and function. We show that treatment with dapagliflozin  
78 ameliorated fibrotic and angiogenic changes as well as ultrafiltration failure.

79

## 80 **MATERIALS AND METHODS**

### 81 *Human peritoneal samples*

82 Human peritoneal biopsies were biopsies taken from PD patients and non-uremic control  
83 patients undergoing surgery because of non-renal causes (excluding trauma, intra-abdominal  
84 neoplasia or inflammation) after informed consent according to the declaration of Helsinki  
85 and local ethics board approval at the Hannover (MHH #17/6715) and Heidelberg (S-  
86 493/2018) study sites. Peritoneal biopsies were processed and analyzed as described  
87 previously.[11,12] The non-CKD patient was 3 years old and underwent surgery because of  
88 reflux, had normal biochemical findings and no signs of inflammation. The PD sample was  
89 obtained from a 14 years old child with nephronophthisis who had been treated with  
90 Balance® (Baxter) for 12 months.

91

### 92 *Peritoneal dialysis fluid exposure model in mice*

93 All animal experiments were approved by the animal protection committee of the local  
94 authorities (Lower Saxony state department for food safety and animal welfare, LAVES,  
95 approval: 33.19-42502-04-16/2266). 12 weeks old female C57Bl/6N mice (Charles River)  
96 were subjected to chronic peritoneal dialysis fluid exposure as described previously.[4] In  
97 short, 2.0 mL of standard PDF composed of 4.25% glucose and buffered with lactate  
98 (CAPD/DPCA3, Stay Safe; Fresenius) or 0.9% saline solution for controls were instilled daily  
99 via a peritoneal catheter connected to an implanted subcutaneous mini access port (Access  
100 Technologies) for 5 weeks (n=5 saline, n=12 PDF). Dapagliflozin at a concentration yielding  
101 a dose of 1 mg/kg body weight was added to saline (n=6) and PDF (n=12), respectively.  
102 Because dapagliflozin is easily soluble in aqueous solution, no vehicle was necessary. On the  
103 last day of experiments functional analysis of the PM was performed by ultrafiltration and  
104 equilibration test and peritoneal effluents were sampled as previously described.[4,13]  
105 Thereafter, tissue samples were collected from the anterior abdominal wall for histological  
106 and immunofluorescence analysis.

107

### 108 *Chemical analyses of blood and urine, peritoneal ultrafiltration and transport studies*

109 24h urine collections, dialysate effluents and plasma were analyzed for glucose, creatinine,  
110 and urea using an Olympus AU480 chemistry analyzer. 2.5 mL of PDF was instilled into the  
111 peritoneal cavity and the mice were sacrificed after 120 minutes. The total intraabdominal  
112 peritoneal fluid was collected, and the drained volume was measured. Peritoneal ultrafiltration  
113 capacity was determined by the amount of peritoneal fluid recovered after 120 minutes.

114 Recovered effluent was either analyzed immediately with flow cytometry or stored at -80 °C  
115 for further ELISA or biochemical analysis.

116 As surrogates for peritoneal solute transport at time point 120 minutes, we calculated  
117 dialysate-to-dialysate<sub>0</sub> (D/D<sub>0</sub>) for glucose as well as dialysate-to-plasma (D/P) ratios for  
118 creatinine and urea. The transport of small solute was also evaluated by the mass transfer area  
119 coefficient (MTAC), using the Garred two-sample model:[14]

$$120 \quad \text{MTAC} = V_{\text{av}}/t_{120\text{min}} \times \ln[\text{Volume}_{\text{in}}(P - D_0)/\text{Volume}_{\text{out}}(P - D_t)],$$

121 in which  $V_{\text{av}}$  is the average of the initial and final volumes; P, the plasma concentration of  
122 urea;  $D_t$ , the dialysate concentration of urea or creatinine at the end of the dwell;  $D_0$ , the initial  
123 concentration of urea or creatinine in dialysate, which is set at 0.

124

#### 125 *Flow cytometry and ELISA measurements in peritoneal effluents.*

126 The inflammatory cell populations in the effluents were analyzed by flow cytometry using a  
127 FACS Canto II cytometer (BD Biosciences). The following monoclonal antibodies  
128 (BioLegend) were used: anti-CD11b (clone M1/70), anti-F4/80 (clone BM8), anti-CD19  
129 (clone 6D5); anti-Gr1(clone RB6-8C5), and anti-TCRb (clone H57-597). Data were analyzed  
130 using FlowJo software (Tree Star). Inflammatory cytokines IL-6, IL-10, IFN $\gamma$ , TNF- $\alpha$  and  
131 MCP-1 were analyzed by bead-based flow cytometry assay (CBA kit, BD Biosciences), TGF-  
132  $\beta$  and VEGF-A with specific ELISA (R&D Systems) according to the manufacturer's  
133 instructions.

134

#### 135 *Morphological, immunofluorescence and immunohistochemical analysis of peritoneum*

136 Submesothelial thickness of the peritoneum was determined on 2.5  $\mu\text{m}$  paraffin-embedded  
137 tissue sections stained with Masson's trichrome (Sigma-Aldrich) by blinded microscopy  
138 analysis (DM-IL microscope, DC300F camera, IM500 software, all Leica Microsystems). To  
139 allow for an unbiased analysis, thickness values were expressed as the mean of 40  
140 independent measurements per animal at standardized interspaced locations of the  
141 peritoneum. Collagen I and III positivity was analyzed on sections stained with picosirius red  
142 (Sigma-Aldrich) using an integrated intensity thresholding method detailed in Supplementary  
143 Methods (ImageJ software); results are given as percentage of total tissue area. Tissue  
144 sections were stained with primary antibodies against SGLT1 (Millipore 07-1417), SGLT2  
145 (Abcam ab85626) and CD31 (Dianova DIA310) respectively. Background control staining  
146 was performed by incubating with secondary antibodies alone, omitting the first antibodies,  
147 and proved to be negative. Cell nuclei were stained with DAPI or hematoxylin Harris. For

148 automated microvessel imaging NanoZoomer 2.0-HT Scan System (Hamamatsu Photonics)  
149 was used at 20x magnification (resolution: 0.46  $\mu\text{m}/\text{pixel}$ ). The slide scanner automatically  
150 detects the region of interest (ROI) containing the tissue and automatically determines a valid  
151 focal plane for scanning. As PDF penetration level reaches 400  $\mu\text{m}$ , an area reaching 400  $\mu\text{m}$   
152 below mesothelial cell layer was annotated as ROI and microvessel density was quantified by  
153 microvessel algorithm v1 (Aperio Image Scope, Leica).

154

#### 155 *RNA extraction and real-time quantitative PCR*

156 Total RNA was extracted from harvested anterior peritoneal walls not affected by the  
157 peritoneal catheter using RNeasy mini kit (Qiagen) and reverse-transcribed using Promega  
158 kits. Real-time quantitative PCR analysis was performed on a LightCycler480 (Roche) real-  
159 time PCR system using SybrGreen as well as TaqMan technologies;  $\beta$ -tubulin and Rn18S  
160 mRNA were used as reference genes. Quantification was conducted using the delta-delta Ct  
161 method.

162

#### 163 *HPMC, immortalized MPMC and RAW264.7 macrophage cell culture and treatment*

164 For *in vitro* experiments, 3 different cell types were analyzed: primary human peritoneal  
165 mesothelial cells (HPMC), immortalized mouse peritoneal cells (MPMC) and murine  
166 peritoneal macrophage cell line RAW264.7.

167 HPMC were derived from omentum samples of 3 human controls as described  
168 previously[4] and grown to 80% confluence. In short, HPMC were isolated with  
169 trypsin/EDTA digestion method from omentum tissue obtained from patients with normal  
170 kidney function undergoing elective abdominal surgery. Informed consent was obtained for  
171 the use of omentum tissue and the study was approved by the institutional ethics committee  
172 (Hannover Medical School #17/6715). The cells were grown in RPMI1640 medium  
173 supplemented with 10% fetal bovine serum (FBS), 100 U/ml penicillin and 100 mg/ml  
174 streptomycin

175 Immortalized MPMC were generated in our lab and cultivated as described  
176 previously[4]. Briefly, the cells were grown to 80% confluence in RPMI1640 medium  
177 containing 1% penicillin–streptomycin, 10% fetal calf serum, 1% insulin/transferrin/selenium  
178 A (all from Life Technologies, Carlsbad, CA), 0.4 mg/ml hydrocortisone (Sigma-Aldrich),  
179 and 10 U/ml recombinant mouse interferon- $\gamma$  (Cell Sciences, Canton, MA) at 33 °C  
180 (permissive conditions) to 80% confluence. For experiments the cells were differentiated for 3  
181 days in the same medium without interferon- $\gamma$  at 37 °C (non-permissive conditions).

182 Murine macrophage RAW264.7 cells were grown to 80% confluence in RPMI1640  
183 medium supplemented with 10% fetal bovine serum (FBS), 100 U/ml penicillin and 100  
184 mg/ml streptomycin

185 All cells were starved overnight in 1% FCS-containing RPMI 1640 medium and then  
186 cultured in the medium with normal (10 mM, NG, control) or high glucose (120 mM, HG)  
187 concentration for 24 or 48 h. For inhibition of SGLT2, different concentrations of  
188 dapagliflozin ranging from 3 to 300  $\mu$ M were added to culture medium. Thereafter, SGLT1  
189 and SGLT2 expression was analyzed in MPMC by RT-PCR as described for mouse  
190 peritoneum and intracellular glucose concentration was measured in MPMC and RAW264.7  
191 cell lysates using Olympus AU480 multianalyzer.

192 In some experiments MPMC and RAW264.7 macrophages were cultured under either  
193 NG or HG conditions with or without addition of dapagliflozin for 48 h, followed by  
194 additional stimulation with LPS (10 ng/mL) for 8h. Conditioned cell culture medium was then  
195 analyzed for MCP-1, TNF- $\alpha$  and IL-6 by bead-based flow cytometry assay (CBA kit, BD  
196 Biosciences).

197

#### 198 *Statistical analysis*

199 Data are presented as means  $\pm$  SEM, if not stated otherwise. D'Agostino & Pearson omnibus  
200 normality test was used to test for normality. Multiple comparisons were analyzed by one-  
201 way ANOVA with Sidak's *post hoc* correction or Kruskal-Wallis nonparametric test with  
202 Dunn's *post hoc* correction. All tests were two-tailed.  $P < 0.05$  was considered to indicate  
203 statistically significant differences. GraphPad Prism 7 was used for data analysis.

204

#### 205 **KEY RESOURCES TABLE**

| <b>REAGENT<br/>RESOURCE</b>                                                   | <b>or</b> | <b>SOURCE</b> | <b>IDENTIFIER</b> |
|-------------------------------------------------------------------------------|-----------|---------------|-------------------|
| <b>Antibodies for<br/>immunofluorescence<br/>and<br/>immunohistochemistry</b> |           |               |                   |
| anti-SGLT1                                                                    |           | Millipore     | 07-1417           |
| anti-SGLT2                                                                    |           | Abcam         | ab85626           |
| anti-CD31 (clone SZ31)                                                        |           | Dianova       | DIA310            |
| <b>Antibodies for flow<br/>cytometry</b>                                      |           |               |                   |
| anti-CD11b                                                                    |           | Biolegend     | clone M1/70       |
| anti-F4/80                                                                    |           | Biolegend     | clone BM8         |
| anti-CD19                                                                     |           | Biolegend     | clone 6D5         |



|                                                      |                             |                                                                                                                                                                       |
|------------------------------------------------------|-----------------------------|-----------------------------------------------------------------------------------------------------------------------------------------------------------------------|
| anti-Gr1                                             | Biolegend                   | clone RB6-8C5                                                                                                                                                         |
| anti-TCRb                                            | Biolegend                   | clone H57-597                                                                                                                                                         |
| <b>Chemicals, Peptides, and Recombinant Proteins</b> |                             |                                                                                                                                                                       |
| Dapagliflozin                                        | Sigma-Aldrich               | Cat#461432-26-8                                                                                                                                                       |
| RPMI 1640                                            | Gibco                       | Cat#21875-034                                                                                                                                                         |
| RIPA buffer                                          | Cell signaling              | Cat#9806                                                                                                                                                              |
| SYBR Green PCR Master Mix                            | Applied Biosystem           | Cat#KK4605                                                                                                                                                            |
| LightCycler 480 RNA Master Hydrolysis probes         | Roche                       | Cat#04991885001                                                                                                                                                       |
| Fluoromount-G                                        | Southern Biotech            | Cat# 0100-01                                                                                                                                                          |
| <b>Critical Commercial Assays</b>                    |                             |                                                                                                                                                                       |
| cDNA Reverse Transcription Kit                       | Promega                     | Cat#C1181<br>Cat#U1515<br>Cat#M1705                                                                                                                                   |
| Rneasy Mini Kit                                      | Qiagen                      | Cat#74106                                                                                                                                                             |
| <b>Oligonucleotides</b>                              |                             |                                                                                                                                                                       |
| TaqMan Primers for qPCR                              | Eurofins                    | N/A                                                                                                                                                                   |
| Slc5a1 PROBE                                         | AAAAAATCGCCTGTGTCTCCCTGAAGA |                                                                                                                                                                       |
| Slc5a1 SENSE                                         | GGAATGATCAGCCGGATTCTAT      |                                                                                                                                                                       |
| Slc5a1 ANTISENSE                                     | TGTGCCGCAGTATTTCTGACA       |                                                                                                                                                                       |
| Slc5a2 PROBE                                         | TCCAGTCCCCGGCTCCAGGC        |                                                                                                                                                                       |
| Slc5a2 SENSE                                         | AATGTGCAATGGAGATGGAAGA      |                                                                                                                                                                       |
| Slc5a2 ANTISENSE                                     | CATCCCACAGAACCAAAGCA        |                                                                                                                                                                       |
| SybrGreen Primers for qPCR                           | Eurofins                    | N/A                                                                                                                                                                   |
| Slc5a1_#1_fwd                                        | TGGGCTGGATATTTGTCCCGA       |                                                                                                                                                                       |
| Slc5a1_#1_rev                                        | CAAACCGCTTCCGCAGATACTT      |                                                                                                                                                                       |
| Slc5a1_#2_fwd                                        | CACCGAGGGCTGACTCATTC        |                                                                                                                                                                       |
| Slc5a1_#2_rev                                        | TGATCCGTACACCAGTACCAC       |                                                                                                                                                                       |
| Slc5a2_#1_fwd                                        | TGGTGTGGCTTGTGGTCTA         |                                                                                                                                                                       |
| Slc5a2_#1_rev                                        | ATGTTGCTGGCGAACAGAGA        |                                                                                                                                                                       |
| Slc5a2_#2_fwd                                        | ATGGAGCAACACGTAGAGGC        |                                                                                                                                                                       |
| Slc5a2_#2_rev                                        | ATGACCAGCAGGAAATAGGCA       |                                                                                                                                                                       |
| <b>Software</b>                                      |                             |                                                                                                                                                                       |
| Aperio Image Scope                                   | Leica                       | <a href="https://www.leicabiosystems.com/digital-pathology/manage/aperio-imagescope/">https://www.leicabiosystems.com/digital-pathology/manage/aperio-imagescope/</a> |
| FlowJo                                               | FlowJo, LLC                 | <a href="https://www.flowjo.com">https://www.flowjo.com</a>                                                                                                           |
| ImageJ                                               | NIH                         | <a href="https://imagej.nih.gov/ij">https://imagej.nih.gov/ij</a>                                                                                                     |
| Prism 7                                              | Graphpad Software           | <a href="https://www.graphpad.com/scientific-software/prism">https://www.graphpad.com/scientific-software/prism</a>                                                   |

## 207 **RESULTS**

### 208 **Sodium-dependent glucose transporters are expressed in the murine and human** 209 **peritoneal membrane**

210 First, we studied the presence of sodium-dependent glucose transporters in the peritoneal  
211 membrane. Using immunofluorescence, we demonstrate in 16 weeks old female C57BL6  
212 mice that both SGLT1 and SGLT2 protein are expressed in the peritoneum, most prominently  
213 in the single mesothelial cell layer, but also in submesothelial skeletal muscle (**Figure 1a,**  
214 **upper row**). Antibody specificity against SGLT1 and SGLT2, respectively, was confirmed in  
215 kidney tissue from the same animals (**Figure 1a, lower row**). Moreover, using  
216 immunohistochemistry and immunofluorescence, we demonstrate presence of SGLT1 and  
217 SGLT2 in the human peritoneum in biopsies from healthy non-CKD control and PD patients,  
218 respectively (**Figure 1b**). In addition to the mesothelial cell layer, SGLT1 protein was  
219 visualized around capillaries in the submesothelial zone.

220

### 221 **Chronic PDF-induced SGLT2 upregulation is abrogated by intraperitoneal** 222 **dapagliflozin treatment**

223 Next, we evaluated the influence of chronic glucose exposure on the peritoneal expression of  
224 sodium-dependent and sodium-independent glucose transporters and to analyze potential  
225 effects of pharmacological inhibition of SGLT2. To this end, we used the well-established  
226 mouse model of catheter-delivered chronic PDF exposure.[4] Mice were treated for 5 weeks  
227 with either saline or PDF with or without addition of dapagliflozin (1 mg/kg) via a peritoneal  
228 catheter (**Figure 2a**). Systemic action of dapagliflozin was observed, as reflected by presence  
229 of glucosuria in 24h urine collections of mice treated with the SGLT2 inhibitor  
230 (**Supplementary Figure 1**).

231 We then evaluated the peritoneal transcriptional expression of SGLT2, SGLT1 and  
232 several GLUTs known to be expressed in the peritoneum. We found a strong upregulation of  
233 SGLT2 expression in mice receiving high glucose PDF, whereas SGLT1 expression was  
234 unaltered (**Figure 2b**). Most notably, pharmacological inhibition of SGLT2 with  
235 dapagliflozin completely abrogated PD-induced upregulation of SGLT2. Glucose transporters  
236 demonstrated differential regulation, GLUT1 and 3 being upregulated and GLUT4 down-  
237 regulated, respectively, in response to chronic exposure to PDF. This regulation was  
238 unaffected by dapagliflozin (**Figure 2c**).

239 In summary, we demonstrated abrogation of PDF-induced SGLT2 transcriptional  
240 upregulation by intraperitoneal application of dapagliflozin.

241

## 242 **Peritoneal fibrosis and ultrafiltration failure are ameliorated by dapagliflozin**

243 Having demonstrated a) the existence of SGLT2 at the murine and human peritoneum, b)  
244 differential regulatory effects of a high glucose environment on peritoneal glucose transporter  
245 expression and c) the effect of pharmacological intervention on expression of SGLT2, we  
246 wanted to further evaluate effects of pharmacological SGLT2 inhibition on the development  
247 of structural and functional changes in the peritoneal membrane. As expected, pronounced  
248 submesothelial thickening and fibrosis developed after a 5 week exposure to PDF (**Figures**  
249 **3a-b**), accompanied by increased TGF- $\beta$  levels in effluent (**Figure 3c**). Most importantly,  
250 ultrafiltration (UF) decreased, as evaluated after a 120 min intraperitoneal dwell of 4.25%  
251 glucose PDF (**Figure 3d**). All aforementioned changes were substantially mitigated by  
252 pharmacological SGLT2 inhibition with dapagliflozin. It should be noted, however, that there  
253 was a trend towards high glucose-independent structural pro-fibrotic changes in animals  
254 receiving saline+dapagliflozin.

255 Functionally, dapagliflozin decreased UF capacity in the absence of a high glucose  
256 environment (**Figure 3d**), which is consistent with findings from peritoneal equilibration  
257 testing (PET), showing that both dapagliflozin and PDF led to a significant decrease of D/D<sub>0</sub>  
258 glucose ratio (**Figure 3e**). The D/D<sub>0</sub> ratio measures the amount of glucose in dialysate after a  
259 120 min dwell of PDF compared to time 0. The decrease of this ratio indicates a faster  
260 reabsorption of glucose, suggesting an acceleration of glucose transport across the peritoneal  
261 membrane. This effect of dapagliflozin was specific for glucose, since we noted no changes  
262 between PDF-treated animals treated with and without dapagliflozin for other solute  
263 transport characteristics: Dialysate-to-plasma ratios (D/P) as well as mass transfer area  
264 coefficients (MTAC) for creatinine and urea were similar across all treatment groups  
265 (**Supplementary Figure 2**).

266 In summary, we demonstrate that dapagliflozin reduced peritoneal fibrotic changes,  
267 resulting in amelioration of PDF-induced ultrafiltration failure.

268

## 269 **Dapagliflozin reduces submesothelial microvessel density in non-VEGF-dependent** 270 **manner**

271 As peritoneal transport is influenced by angiogenesis, which is upregulated in response to  
272 PDF,<sup>[11]</sup> we next evaluated microvessel density in CD31-stained sections of murine  
273 peritoneum. As expected, PDF-treated animals demonstrated a substantial increase of CD31  
274 positive cells in an area 400  $\mu$ m below the mesothelial cell layer (**Figure 4a**). Automated

275 counting of microvessels in the submesothelial zone confirmed a significant increase in vessel  
276 density (**Figures 4a-b**). Dapagliflozin-treated animals demonstrated reduced microvessel  
277 density ( $p=0.06$ ). Of note, while PDF-treated animals showed a significant increase in  
278 vascular endothelial growth factor A (VEGF-A) levels in peritoneal effluents, dapagliflozin-  
279 treated animals had similar levels of VEGF-A, suggesting that dapagliflozin-mediated  
280 reduction of angiogenesis was independent of VEGF-A (**Figure 4c**).

281

### 282 **Dapagliflozin modulates intraperitoneal inflammatory response**

283 After demonstrating ameliorating effects of SGLT2 inhibition on development of peritoneal  
284 fibrosis, angiogenesis and UF failure in a high glucose milieu we were interested to evaluate  
285 its effects on intraperitoneal inflammation. We therefore analyzed the composition of  
286 intraperitoneal cell influx in effluents obtained after a 120 min dwell of PDF across all  
287 groups. Consistent with previous findings from our group,[4] chronic PDF exposure led to a  
288 significant increase in peritoneal cell count, predominantly leukocytes. Significantly different  
289 changes were noted for T cells, B cells, polymorphonuclear neutrophils (PMN) and  
290 macrophages (**Figure 5a**). While dapagliflozin had no effect on T and B cell composition, we  
291 noted a significantly reduced amount of PMN and an increase in macrophages beyond the  
292 PDF-mediated level. Concurrently, intraperitoneal cytokine levels measured in effluents by  
293 ELISA demonstrated increases of pro-inflammatory markers IL-6, TNF- $\alpha$  and MCP-1 after  
294 PDF exposure (**Figure 5b**). Interferon- $\gamma$  and anti-inflammatory interleukin-10 also increased  
295 in effluents of PDF-exposed mice compared with saline-treated controls, but there were no  
296 significant differences in PDF-exposed animals treated with or without dapagliflozin. Again,  
297 similarly with pro-fibrotic changes, there was a non-significant trend towards high glucose-  
298 independent increase of pro-inflammatory mediators MCP-1 and TNF- $\alpha$  in animals receiving  
299 saline and dapagliflozin (**Figure 5b**).

300

### 301 **Dapagliflozin abrogates pro-inflammatory signaling in murine and human peritoneal** 302 **mesothelial cells and exerts glucose-independent anti-inflammatory effects on murine** 303 **peritoneal macrophages**

304 As SGLT2 inhibition significantly ameliorated *in vivo* fibrotic and functional changes and had  
305 equivocal effects on inflammatory response, we wanted to further analyze the effects of  
306 dapagliflozin on mesothelial cells and macrophages *in vitro*. In murine omentum-derived  
307 mesothelial cells, only SGLT2, but not SGLT1 transcription was upregulated in response to  
308 dapagliflozin in a high glucose environment (**Figure 5a**).

309           Pharmacological inhibition of SGLT2 decreased both glucose consumption and  
310 uptake in HPMC.[15] We therefore asked whether dapagliflozin decreases intracellular  
311 glucose content in murine mesothelial cells and macrophages cultured under high glucose  
312 conditions. Expectedly, glucose concentration in lysates of both MPMC and macrophages  
313 significantly increased in high glucose conditions (**Figure 6b**). Dapagliflozin reduced glucose  
314 uptake in a dose-dependent manner both under normal and high glucose conditions in  
315 MPMC. In contrast, in murine macrophages, dapagliflozin affected glucose uptake only in a  
316 high glucose milieu. It should be noted that high glucose-induced increase of intracellular  
317 glucose concentration was only partially reduced and not completely normalized by  
318 dapagliflozin in either cell type.

319           The effect of dapagliflozin on high glucose-induced MCP-1 production in mesothelial  
320 cells and macrophages was analyzed next. Both in murine (MPMC) and human peritoneal  
321 mesothelial cells (HPMC) dapagliflozin reduced MCP-1 release in a high glucose milieu,  
322 while it had no effect in normal glucose conditions (**Figure 6c**). Consistent with our previous  
323 findings, mesothelial cells increased MCP-1 production in response to high glucose, while  
324 murine macrophages produced less, possibly reflecting a shift to M2 polarization under high  
325 glucose conditions.[13] Similarly, dapagliflozin administered in normal glucose conditions  
326 reduced MCP-1 release but had no further effect in high glucose conditions. These effects  
327 were also observed for TNF- $\alpha$  production (**Figure 6d**).

328           Given our observation of increased peritoneal macrophages in peritoneal effluents in  
329 PDF+dapagliflozin-treated animals, we evaluated dapagliflozin action in murine macrophages  
330 under similar normal vs. high glucose conditions with an additional pro-inflammatory  
331 stimulus. To this end, we used an experimental setup where the cells were first cultured for 48  
332 h under normal or high glucose conditions with or without dapagliflozin and thereafter  
333 additionally stimulated with 100 ng/mL LPS for 8h (**Figure 7**). In line with previous  
334 observations, increased macrophage production of pro-inflammatory mediators MCP-1  
335 (**Figure 7a**), TNF- $\alpha$  (**Figure 7b**) and IL-6 (**Figure 7c**) upon LPS stimulation was toned down  
336 in a high glucose compared to a normal glucose environment. This signature is well-known  
337 for M2 macrophages, which make up a considerably larger fraction of macrophages in  
338 glucose-mediated PM damage and for which we have previously demonstrated glucose to be  
339 the decisive driver of this M1-to-M2 switch.[13] Dapagliflozin decreased pro-inflammatory  
340 response only under normal glucose conditions, but not in high glucose conditions (**Figure**  
341 **7c**), thereby tying in with our *in vivo* observations in PDF-treated mice.

342

## 343 **DISCUSSION**

344 Glucose has been implicated as a major mechanism of peritoneal membrane pathophysiology  
345 in PD.[16,17] The chronic peritoneal glucose exposure induces significant systemic sequelae.  
346 We have previously shown that daily dialytic glucose exposure is associated with vascular  
347 complement and TGF- $\beta$  activation and closely correlated with the degree of vasculopathy.[18]  
348 The major route of glucose uptake into mammalian cells is through either facilitative glucose  
349 transporters (GLUT)[19] or sodium-driven glucose symporters (SGLT).[20] These glucose  
350 transporters are cell-specifically expressed and have specialized glucose-sensing properties,  
351 which contribute to glycolysis and related cellular functions.[21] However, information about  
352 glucose uptake into mesothelial cells and its regulation is scarce. From cell culture studies in  
353 HPMC we know that GLUT mRNA expression and glucose uptake are induced by high  
354 ambient glucose concentration as well as by proinflammatory cytokines.[22] In addition, it has  
355 been known for over three decades that protein kinase C (PKC) activation rapidly initiates  
356 glucose uptake into cells and may phosphorylate GLUT1.[23] Given that we have previously  
357 shown that classical PKC isoform  $\alpha$  in mesothelial cells is responsible for glucose-mediated  
358 peritoneal membrane damage,[4] it is interesting that the phosphorylation site for conventional  
359 and novel PKCs was only recently identified in GLUT1,[24] highlighting the importance of  
360 cellular glucose transport. In addition to GLUT, the expression of SGLT1 and SGLT2 in  
361 mesothelial cells cultured *in vitro* has already been reported.[6,15] Despite the recent surge of  
362 information on SGLT2, however, it is less clear whether this protein might represent a viable  
363 target for influencing peritoneal health.

364 In the present study, we demonstrate that both SGLT1 and SGLT2 are expressed in the  
365 peritoneal membrane in mice and humans. In mice, chronic exposure of the peritoneal  
366 membrane to a high glucose milieu in PDF regulated the expression of glucose transporters  
367 such as GLUT1, GLUT3, GLUT4 and SGLT2. We show for the first time that SGLT2  
368 inhibition via intraperitoneal application of dapagliflozin ameliorates structural and functional  
369 changes in PDF-induced peritoneal fibrosis. Dapagliflozin/PDF treatment reduced peritoneal  
370 thickening and fibrosis and improved ultrafiltration compared to animals treated with PDF  
371 alone. These changes are in keeping with evidence from other organs where SGLT2 inhibition  
372 has been associated with antifibrotic effects, most prominently in the kidney but also in the  
373 heart and the liver. For example, dapagliflozin promoted antifibrotic effects in a type 1  
374 diabetic kidney disease model by ameliorating O-GlcNAcylation and reducing tubular  
375 hypoxia,[25] while others have found a downregulation in the Stat1/TGF- $\beta$  pathway as well as  
376 decreased epithelial-to-mesenchymal transition.[26] Importantly, beneficial effects of SGLT2

377 inhibition were also demonstrated in non-diabetic kidney disease such as hypertensive  
378 nephropathy and were attributed to anti-inflammatory effects.[27] Similarly, anti-fibrotic  
379 effects of SGLT2 inhibition were found in liver[9] and heart,[10] where administration of  
380 dapagliflozin reduced cardiac fibrosis by stimulating M2 macrophages and inhibiting  
381 myofibroblast differentiation.[28] Microvessel density in the first 400  $\mu\text{m}$  below mesothelial  
382 cell layers, representing the penetration level of PD fluids,[29] was increased in PDF-treated  
383 animals and additional dapagliflozin treatment mitigated this PDF-induced increase. In PD  
384 patients, within a few months after PD start, glucose-containing PDF induces an increase of  
385 peritoneal microvessel density, which is associated with peritoneal membrane transport  
386 function at baseline and during PD.[11] Thus, reduced microvessel density may have  
387 contributed to mitigation of PD-induced UF loss. However, since the  $D/D_0$  glucose ratio was  
388 not improved, the substantially reduced fibrosis may have contributed to the mitigated UF  
389 loss by improving osmotic conductance to glucose, a significant determinant of UF in PD.[30]  
390 The effluent cytokine analyses suggest a VEGF-independent mechanism of reduced  
391 peritoneal vascularization by SGLT2 inhibition and argue in favor of pathways such as  
392 modulation of angiopoietin 1/2,[31] but determination of tissue cytokine abundance may be  
393 more sensitive and valid.

394 As mentioned above, we observed some glucose-independent detrimental side effects  
395 of dapagliflozin. The dose of 1 mg/kg of dapagliflozin used in our experiments has been  
396 shown as safe and well tolerated in mice if given systemically up to 12 weeks.[32,33] In order  
397 to achieve effective concentrations of dapagliflozin in the peritoneal cavity, we used an  
398 intraperitoneal way of administration. It should be noted that despite local application of  
399 dapagliflozin, systemic action was observed, as reflected by presence of glucosuria in 24 h  
400 urine collections of mice treated with the SGLT2 inhibitor. This suggests uptake by peritoneal  
401 blood capillaries or by lymphatics, which is not surprising given the low molecular weight of  
402 dapagliflozin. However, we cannot fully exclude intraperitoneal accumulation of  
403 dapagliflozin leading to increased local concentration, which might possibly result in local  
404 toxic effects. It would be interesting to test whether systemic application of dapagliflozin will  
405 still have a protective effect at the PM without possible detrimental glucose-independent side  
406 effects observed by local application. In the setting of a high glucose environment, however,  
407 we saw significant benefits of additional dapagliflozin application.

408 Despite the marked reduction of peritoneal fibrotic changes and microvessel density  
409 with SGLT2 inhibition in our PDF exposure model, dapagliflozin action on glucose-mediated  
410 peritoneal inflammatory response was more complex. While cell influx to the peritoneal

411 cavity was unchanged with regard to T and B cells, we noted a significant reduction of PMN  
412 and increase in peritoneal macrophages. At the same time, dapagliflozin administered in the  
413 absence of a high glucose milieu showed a trend towards PM thickening ( $p=0.10$ ), whereas  
414 increases in proinflammatory cytokines such as IL-6, TNF- $\alpha$  and MCP-1, and anti-  
415 inflammatory cytokines such as IL-10 and IFN- $\gamma$  were not statistically significant. Given  
416 these equivocal *in vivo* results, we tried to pinpoint the influence of a high glucose milieu and  
417 SGLT2 inhibition on inflammatory responses of mesothelial cells and macrophages *in vitro*.  
418 Interestingly, mesothelial cells demonstrated dapagliflozin-mediated reduction of MCP-1 only  
419 in the presence of a high glucose milieu, whereas in macrophages this reductive effect was  
420 only noticeable in normal glucose conditions. There is an accumulating body of evidence that  
421 macrophages are important targets for anti-inflammatory effects mediated by SGLT2  
422 inhibition. For example, SGLT2 inhibition prevented inflammation via inhibition of  
423 macrophage accumulation and MCP-1 expression.[34] In another study, empagliflozin  
424 inhibited MCP1 and TGF- $\beta$  gene expression in an experimental model of diabetic  
425 nephropathy,[35] while others have found that SGLT2 inhibition reduced levels of MCP-1, IL-  
426 6 and TNF- $\alpha$  in aortic plaques and adipose tissue,[36] as well as nuclear factor  $\kappa$ B and IL6  
427 levels in renal tissues.[37] Also, respective effects have been attributed to polarization of  
428 macrophages towards an M2 phenotype.[38] Here, we studied the effects of SGLT2 inhibition  
429 on macrophages challenged with an inflammatory stimulus in both normal and high glucose  
430 milieus. To this end, we stimulated macrophages with LPS after treating them with either  
431 normal or high glucose conditions in presence or absence of dapagliflozin. We observed that  
432 when macrophages were not challenged by LPS, dapagliflozin had no effect on  
433 proinflammatory marker release, whereas MCP-1 and TNF- $\alpha$  were significantly reduced by  
434 SGLT2 inhibition in the presence of an inflammatory stimulus such as LPS. This effect was  
435 seen in cells cultured under normal glucose conditions (**Figure 6d**), suggesting that SGLT2  
436 inhibition can shift macrophages to M2 polarization independently from glucose. This  
437 observation is in line with a recently published novel mechanism of SGLT2 inhibitors-  
438 mediated M2 polarization through a glucose-independent reactive oxygen and nitrogen  
439 species-dependent STAT3-mediated pathway.[28] In line with this, when macrophages were  
440 cultured under high glucose condition and therefore already shifted to M2 prior to LPS  
441 stimulation,[13] anti-inflammatory effects of dapagliflozin were still observed albeit less  
442 pronounced and reached statistical significance for MCP-1 only (**Figure 7**).

443 In summary, our data demonstrate the presence of SGLT2 in the murine and human  
444 peritoneum, its regulation by glucose in mice and beneficial effects of its inhibition by



445 dapagliflozin on peritoneal and mesothelial cell health *in vivo* and *in vitro*. Further studies  
446 defining the cellular pathways of SGLT2 inhibition influencing peritoneal membrane  
447 pathophysiology are warranted in order to understand whether its use in PD patients is a  
448 viable treatment option.

449

## 450 REFERENCES

- 451 1. Devuyst, O.; Margetts, P.J.; Topley, N. The pathophysiology of the peritoneal  
452 membrane. *J Am Soc Nephrol* **2010**, *21*, 1077-1085, doi:10.1681/ASN.2009070694.
- 453 2. Balzer, M.S. Molecular pathways in peritoneal fibrosis. *Cell Signal* **2020**,  
454 10.1016/j.cellsig.2020.109778, 109778, doi:10.1016/j.cellsig.2020.109778.
- 455 3. Rosenberg, M.E. Peritoneal dialysis: diabetes of the peritoneal cavity. *The Journal of*  
456 *laboratory and clinical medicine* **1999**, *134*, 103-104.
- 457 4. Wang, L.; Balzer, M.S.; Rong, S.; Menne, J.; von Vietinghoff, S.; Dong, L.; Gueler,  
458 F.; Jang, M.S.; Xu, G.; Timrott, K., et al. Protein kinase C alpha inhibition prevents  
459 peritoneal damage in a mouse model of chronic peritoneal exposure to high-glucose  
460 dialysate. *Kidney Int* **2016**, *89*, 1253-1267, doi:10.1016/j.kint.2016.01.025.
- 461 5. Holmes, C.; Mujais, S. Glucose sparing in peritoneal dialysis: implications and  
462 metrics. *Kidney international. Supplement* **2006**, 10.1038/sj.ki.5001924, S104-109,  
463 doi:10.1038/sj.ki.5001924.
- 464 6. Schroppel, B.; Fischeder, M.; Wiese, P.; Segerer, S.; Huber, S.; Kretzler, M.; Heiss,  
465 P.; Sitter, T.; Schlondorff, D. Expression of glucose transporters in human peritoneal  
466 mesothelial cells. *Kidney Int* **1998**, *53*, 1278-1287, doi:10.1046/j.1523-  
467 1755.1998.00899.x.
- 468 7. Debray-Garcia, Y.; Sanchez, E.I.; Rodriguez-Munoz, R.; Venegas, M.A.; Velazquez,  
469 J.; Reyes, J.L. Diabetes and exposure to peritoneal dialysis solutions alter tight  
470 junction proteins and glucose transporters of rat peritoneal mesothelial cells. *Life Sci*  
471 **2016**, *161*, 78-89, doi:10.1016/j.lfs.2016.07.018.
- 472 8. Zhang, Y.; Nakano, D.; Guan, Y.; Hitomi, H.; Uemura, A.; Masaki, T.; Kobara, H.;  
473 Sugaya, T.; Nishiyama, A. A sodium-glucose cotransporter 2 inhibitor attenuates renal  
474 capillary injury and fibrosis by a vascular endothelial growth factor-dependent  
475 pathway after renal injury in mice. *Kidney Int* **2018**, *94*, 524-535,  
476 doi:10.1016/j.kint.2018.05.002.
- 477 9. Tang, L.; Wu, Y.; Tian, M.; Sjostrom, C.D.; Johansson, U.; Peng, X.R.; Smith, D.M.;  
478 Huang, Y. Dapagliflozin slows the progression of the renal and liver fibrosis  
479 associated with type 2 diabetes. *Am J Physiol Endocrinol Metab* **2017**, *313*, E563-  
480 E576, doi:10.1152/ajpendo.00086.2017.
- 481 10. Li, C.; Zhang, J.; Xue, M.; Li, X.; Han, F.; Liu, X.; Xu, L.; Lu, Y.; Cheng, Y.; Li, T.,  
482 et al. SGLT2 inhibition with empagliflozin attenuates myocardial oxidative stress and

- 483 fibrosis in diabetic mice heart. *Cardiovasc Diabetol* **2019**, *18*, 15,  
484 doi:10.1186/s12933-019-0816-2.
- 485 11. Schaefer, B.; Bartosova, M.; Macher-Goeppinger, S.; Sallay, P.; Voros, P.; Ranchin,  
486 B.; Vondrak, K.; Ariceta, G.; Zaloszcyc, A.; Bayazit, A.K., et al. Neutral pH and low-  
487 glucose degradation product dialysis fluids induce major early alterations of the  
488 peritoneal membrane in children on peritoneal dialysis. *Kidney Int* **2018**, *94*, 419-429,  
489 doi:10.1016/j.kint.2018.02.022.
- 490 12. Schaefer, B.; Bartosova, M.; Macher-Goeppinger, S.; Ujszaszi, A.; Wallwiener, M.;  
491 Nyarangi-Dix, J.; Sallay, P.; Burkhardt, D.; Querfeld, U.; Pfeifle, V., et al.  
492 Quantitative Histomorphometry of the Healthy Peritoneum. *Sci Rep* **2016**, *6*, 21344,  
493 doi:10.1038/srep21344.
- 494 13. Balzer, M.S.; Helmke, A.; Ackermann, M.; Casper, J.; Dong, L.; Hiss, M.; Kiyani, Y.;  
495 Rong, S.; Timrott, K.; von Vietinghoff, S., et al. Protein kinase C beta deficiency  
496 increases glucose-mediated peritoneal damage via M1 macrophage polarization and  
497 up-regulation of mesothelial protein kinase C alpha. *Nephrol Dial Transplant* **2019**,  
498 *34*, 947-960, doi:10.1093/ndt/gfy282.
- 499 14. Zhang, P.; Dai, H.; Peng, L. Involvement of STAT3 Signaling in High Glucose-  
500 Induced Epithelial Mesenchymal Transition in Human Peritoneal Mesothelial Cell  
501 Line HMrSV5. *Kidney & blood pressure research* **2019**, *44*, 179-187,  
502 doi:10.1159/000498965.
- 503 15. Zhou, Y.; Fan, J.; Zheng, C.; Yin, P.; Wu, H.; Li, X.; Luo, N.; Yu, X.; Chen, C.  
504 SGLT-2 inhibitors reduce glucose absorption from peritoneal dialysis solution by  
505 suppressing the activity of SGLT-2. *Biomed Pharmacother* **2019**, *109*, 1327-1338,  
506 doi:10.1016/j.biopha.2018.10.106.
- 507 16. Davies, S.J.; Phillips, L.; Naish, P.F.; Russell, G.I. Peritoneal glucose exposure and  
508 changes in membrane solute transport with time on peritoneal dialysis. *J Am Soc*  
509 *Nephrol* **2001**, *12*, 1046-1051.
- 510 17. Ha, H.; Yu, M.R.; Lee, H.B. High glucose-induced PKC activation mediates TGF-beta  
511 1 and fibronectin synthesis by peritoneal mesothelial cells. *Kidney Int* **2001**, *59*, 463-  
512 470, doi:10.1046/j.1523-1755.2001.059002463.x.
- 513 18. Bartosova, M.; Schaefer, B.; Bermejo, J.L.; Tarantino, S.; Lasitschka, F.; Macher-  
514 Goeppinger, S.; Sinn, P.; Warady, B.A.; Zaloszcyc, A.; Parapatits, K., et al.  
515 Complement Activation in Peritoneal Dialysis-Induced Arteriopathy. *J Am Soc*  
516 *Nephrol* **2017**, 10.1681/ASN.2017040436, doi:10.1681/ASN.2017040436.
- 517 19. Deng, D.; Yan, N. GLUT, SGLT, and SWEET: Structural and mechanistic  
518 investigations of the glucose transporters. *Protein Sci* **2016**, *25*, 546-558,  
519 doi:10.1002/pro.2858.
- 520 20. Wright, E.M.; Loo, D.D.; Hirayama, B.A. Biology of human sodium glucose  
521 transporters. *Physiological reviews* **2011**, *91*, 733-794,  
522 doi:10.1152/physrev.00055.2009.

- 523 21. Zhao, F.Q.; Keating, A.F. Functional properties and genomics of glucose transporters.  
524 *Curr Genomics* **2007**, *8*, 113-128, doi:10.2174/138920207780368187.
- 525 22. Fischereder, M.; Schropfel, B.; Wiese, P.; Fink, M.; Banas, B.; Schmidbauer, S.;  
526 Schlondorff, D. Regulation of glucose transporters in human peritoneal mesothelial  
527 cells. *Journal of nephrology* **2003**, *16*, 103-109.
- 528 23. Witters, L.A.; Vater, C.A.; Lienhard, G.E. Phosphorylation of the glucose transporter  
529 in vitro and in vivo by protein kinase C. *Nature* **1985**, *315*, 777-778.
- 530 24. Lee, E.E.; Ma, J.; Sacharidou, A.; Mi, W.; Salato, V.K.; Nguyen, N.; Jiang, Y.;  
531 Pascual, J.M.; North, P.E.; Shaul, P.W., et al. A Protein Kinase C Phosphorylation  
532 Motif in GLUT1 Affects Glucose Transport and is Mutated in GLUT1 Deficiency  
533 Syndrome. *Mol Cell* **2015**, *58*, 845-853, doi:10.1016/j.molcel.2015.04.015.
- 534 25. Hodrea, J.; Balogh, D.B.; Hosszu, A.; Lenart, L.; Besztercei, B.; Koszegi, S.;  
535 Sparding, N.; Genovese, F.; Wagner, L.J.; Szabo, A.J., et al. Reduced O-  
536 GlcNAcylation and tubular hypoxia contribute to the antifibrotic effect of SGLT2  
537 inhibitor dapagliflozin in the diabetic kidney. *American journal of physiology. Renal*  
538 *physiology* **2020**, *318*, F1017-F1029, doi:10.1152/ajprenal.00021.2020.
- 539 26. Huang, F.; Zhao, Y.; Wang, Q.; Hillebrands, J.L.; van den Born, J.; Ji, L.; An, T.; Qin,  
540 G. Dapagliflozin Attenuates Renal Tubulointerstitial Fibrosis Associated With Type 1  
541 Diabetes by Regulating STAT1/TGFbeta1 Signaling. *Front Endocrinol (Lausanne)*  
542 **2019**, *10*, 441, doi:10.3389/fendo.2019.00441.
- 543 27. Castoldi, G.; Carletti, R.; Ippolito, S.; Colzani, M.; Barzaghi, F.; Stella, A.; Zerbini,  
544 G.; Perseghin, G.; di Gioia, C.R.T. Renal Anti-Fibrotic Effect of Sodium Glucose  
545 Cotransporter 2 Inhibition in Angiotensin II-Dependent Hypertension. *Am J Nephrol*  
546 **2020**, *51*, 119-129, doi:10.1159/000505144.
- 547 28. Lee, T.M.; Chang, N.C.; Lin, S.Z. Dapagliflozin, a selective SGLT2 Inhibitor,  
548 attenuated cardiac fibrosis by regulating the macrophage polarization via STAT3  
549 signaling in infarcted rat hearts. *Free Radic Biol Med* **2017**, *104*, 298-310,  
550 doi:10.1016/j.freeradbiomed.2017.01.035.
- 551 29. Flessner, M.F.; Fenstermacher, J.D.; Dedrick, R.L.; Blasberg, R.G. A distributed  
552 model of peritoneal-plasma transport: tissue concentration gradients. *Am J Physiol*  
553 **1985**, *248*, F425-435, doi:10.1152/ajprenal.1985.248.3.F425.
- 554 30. Martus, G.; Bergling, K.; Simonsen, O.; E., G.; J., M.; Öberg, C.M. Novel Method for  
555 Osmotic Conductance to Glucose in Peritoneal Dialysis. *Kidney Int Rep* **2020**,  
556 10.1016/j.ekir.2020.09.003, doi:10.1016/j.ekir.2020.09.003.
- 557 31. Eich, G.; Bartosova, M.; Tischer, C.; Wlodkowski, T.T.; Schaefer, B.; Pichl, S.;  
558 Kraewer, N.; Ranchin, B.; Vondrak, K.; Liebau, M.C., et al. Bicarbonate buffered  
559 peritoneal dialysis fluid upregulates angiopoietin-1 and promotes vessel maturation.  
560 *PloS one* **2017**, *12*, e0189903, doi:10.1371/journal.pone.0189903.
- 561 32. Hatanaka, T.; Ogawa, D.; Tachibana, H.; Eguchi, J.; Inoue, T.; Yamada, H.; Takei, K.;  
562 Makino, H.; Wada, J. Inhibition of SGLT2 alleviates diabetic nephropathy by

- 563 suppressing high glucose-induced oxidative stress in type 1 diabetic mice. *Pharmacol*  
564 *Res Perspect* **2016**, *4*, e00239, doi:10.1002/prp2.239.
- 565 33. Leng, W.; Ouyang, X.; Lei, X.; Wu, M.; Chen, L.; Wu, Q.; Deng, W.; Liang, Z. The  
566 SGLT-2 Inhibitor Dapagliflozin Has a Therapeutic Effect on Atherosclerosis in  
567 Diabetic ApoE(-/-) Mice. *Mediators Inflamm* **2016**, *2016*, 6305735,  
568 doi:10.1155/2016/6305735.
- 569 34. Wang, X.X.; Levi, J.; Luo, Y.; Myakala, K.; Herman-Edelstein, M.; Qiu, L.; Wang,  
570 D.; Peng, Y.; Grenz, A.; Lucia, S., et al. SGLT2 Protein Expression Is Increased in  
571 Human Diabetic Nephropathy: SGLT2 PROTEIN INHIBITION DECREASES  
572 RENAL LIPID ACCUMULATION, INFLAMMATION, AND THE  
573 DEVELOPMENT OF NEPHROPATHY IN DIABETIC MICE. *The Journal of*  
574 *biological chemistry* **2017**, *292*, 5335-5348, doi:10.1074/jbc.M117.779520.
- 575 35. Hill, N.R.; Fatoba, S.T.; Oke, J.L.; Hirst, J.A.; O'Callaghan, C.A.; Lasserson, D.S.;  
576 Hobbs, F.D. Global Prevalence of Chronic Kidney Disease - A Systematic Review  
577 and Meta-Analysis. *PloS one* **2016**, *11*, e0158765, doi:10.1371/journal.pone.0158765.
- 578 36. Han, J.H.; Oh, T.J.; Lee, G.; Maeng, H.J.; Lee, D.H.; Kim, K.M.; Choi, S.H.; Jang,  
579 H.C.; Lee, H.S.; Park, K.S., et al. The beneficial effects of empagliflozin, an SGLT2  
580 inhibitor, on atherosclerosis in ApoE (-/-) mice fed a western diet. *Diabetologia* **2017**,  
581 *60*, 364-376, doi:10.1007/s00125-016-4158-2.
- 582 37. Vallon, V.; Gerasimova, M.; Rose, M.A.; Masuda, T.; Satriano, J.; Mayoux, E.;  
583 Koepsell, H.; Thomson, S.C.; Rieg, T. SGLT2 inhibitor empagliflozin reduces renal  
584 growth and albuminuria in proportion to hyperglycemia and prevents glomerular  
585 hyperfiltration in diabetic Akita mice. *American journal of physiology. Renal*  
586 *physiology* **2014**, *306*, F194-204, doi:10.1152/ajprenal.00520.2013.
- 587 38. Xu, L.; Nagata, N.; Nagashimada, M.; Zhuge, F.; Ni, Y.; Chen, G.; Mayoux, E.;  
588 Kaneko, S.; Ota, T. SGLT2 Inhibition by Empagliflozin Promotes Fat Utilization and  
589 Browning and Attenuates Inflammation and Insulin Resistance by Polarizing M2  
590 Macrophages in Diet-induced Obese Mice. *EBioMedicine* **2017**, *20*, 137-149,  
591 doi:10.1016/j.ebiom.2017.05.028.
- 592

## FIGURE LEGENDS

### **Figure 1: Expression of sodium-dependent glucose transporters (SGLT) at the murine and human peritoneal membrane.**

(A) Immunofluorescence staining of SGLT1 and SGLT2 in mouse peritoneal membranes. Antibody specificity is demonstrated in kidney positive controls, which show specific and distinct staining patterns of the proximal tubule brush-border membrane for SGLT1 (asterisk) and SGLT2 (arrowheads), respectively. Staining of the mesothelial cell layer for SGLT1 and SGLT2, respectively, is denoted by arrows. Blue staining denotes DAPI, scale bar=100  $\mu\text{m}$ .

(B) Immunohistochemistry and immunofluorescence staining for SGLT1 (left) and SGLT2 (right), respectively, in human peritoneal biopsies from non-PD control and PD patients, respectively. Note staining of the mesothelial cell layer and in the pericapillary region. Blue staining denotes DAPI, scale bar=100  $\mu\text{m}$ .

### **Figure 2: PDF-mediated regulation of peritoneal SGLT and GLUT *in vivo*.**

(A) Schematic of the study design. C57Bl/6N mice were subjected to 5 weeks of daily treatment with either saline or high glucose (4.25%)-containing PD fluid (PDF)  $\pm$  dapagliflozin (1 mg/kg body weight).

(B) Murine peritoneal membrane mRNA expression of *Sglt1* and *Sglt2*. Expression was normalized to  $\beta$ -tubulin (*Tubb1*). ns, not significant; \*\*\*  $p < 0.001$ , \*\*\*\*  $p < 0.0001$  for Kruskal-Wallis test.

(C) Murine peritoneal membrane mRNA expression of *Glut1*, *Glut3* and *Glut4*. Expression was normalized to *Rn18s*. ns, not significant; \*\*  $p < 0.01$ , \*\*\*\*  $p < 0.0001$  for Kruskal-Wallis test.

### **Figure 3: Amelioration of peritoneal fibrosis and ultrafiltration failure by dapagliflozin.**

(A) Representative images and quantification of Masson's trichrome staining of murine peritoneum in animals treated with saline, saline+dapagliflozin, peritoneal dialysis fluid (PDF) and PDF+dapagliflozin, respectively. Scale bar=100  $\mu\text{m}$ ; \*\*  $p < 0.01$ , \*\*\*  $p < 0.001$  for ANOVA.

(B) Visualization of collagen I and III as surrogate for submesothelial fibrosis. Representative images of Picosirius red staining of murine peritoneum. Scale bar=100  $\mu\text{m}$ . Quantification of percentage of submesothelial fibrosis. \*  $p < 0.05$ , \*\*  $p < 0.01$  for ANOVA.

(C) Quantification of peritoneal effluent TGF- $\beta$  as analyzed by ELISA. \*  $p < 0.05$ , \*\*\*  $p < 0.001$  for ANOVA.

(D) Quantification of ultrafiltration capacity as analyzed by intraabdominal volume after a 120 min challenge with high glucose (4.25%) PDF after 5 weeks of respective treatment conditions. Values  $>1.0$  indicate ultrafiltration, whereas values  $<1.0$  indicate net fluid absorption; \*  $p<0.05$ , \*\*\*  $p<0.001$  for ANOVA.

(E) Analysis of glucose transporter status by peritoneal equilibration testing at time points 0 and 120 min, respectively.  $D$  and  $D_0$  denote peritoneal effluent glucose concentrations at time points 120 min and 0, respectively; \*  $p<0.05$ , \*\*\*  $p<0.001$  for Kruskal-Wallis test.

**Figure 4: Dapagliflozin reduces submesothelial microvessel density.**

(A) Representative images of immunohistochemistry staining against CD31 in murine peritoneum in animals treated with saline, saline+dapagliflozin, PDF and PDF+dapagliflozin, respectively. Scale bar=200  $\mu\text{m}$ .

(B) Quantification of microvessel density within an area reaching 400  $\mu\text{m}$  below the mesothelial cell layer using Aperio Image Scope microvessel algorithm v1; \*\*\*\*  $p<0.0001$  for ANOVA.

(C) Quantification of peritoneal effluent levels for vascular endothelial growth factor A (VEGF-A); \*\*\*  $p<0.001$  for ANOVA.

**Figure 5: Modulation of intraperitoneal inflammatory response by dapagliflozin.**

(A) Quantification of inflammatory cell recruitment of total cells,  $\text{CD11b}^+$  cells (leukocytes),  $\alpha\beta\text{TCR}^+$  cells (T cells),  $\text{CD19}^+$  cells (B cells), polymorphonuclear neutrophils (PMN) and macrophages to the peritoneal cavity, as measured by flow cytometry; \*  $p<0.05$ , \*\*  $p<0.01$ , \*\*\*  $p<0.001$ , \*\*\*\*  $p<0.0001$  for Kruskal-Wallis test or ANOVA, as applicable.

(B) Quantification of peritoneal effluent levels of pro-inflammatory cytokines interleukin-6 (IL-6), tumor necrosis factor- $\alpha$  (TNF- $\alpha$ ) and monocyte chemoattractant protein-1 (MCP-1), anti-inflammatory cytokines IL-10 and interferon- $\gamma$  (IFN- $\gamma$ ); \*  $p<0.05$ , \*\*  $p<0.01$ , \*\*\*  $p<0.001$  for Kruskal-Wallis test or ANOVA, as applicable.

**Figure 6: Dapagliflozin abrogates pro-inflammatory signaling *in vitro* in mesothelial cells and exerts anti-inflammatory effects in macrophages.**

(A) Quantification of mRNA expression of *Sglt1* and *Sglt2* in MPMC in response to high glucose conditions with or without additional dapagliflozin treatment in ascending concentrations. \*  $p<0.05$  for Kruskal-Wallis test.

(B) Quantification of glucose concentration in lysates of MPMC (left) and murine macrophages (right) as a surrogate of cellular glucose uptake under either normal or high glucose conditions with or without additional dapagliflozin treatment for 48 h in different concentrations. NG, normal glucose (10 mM); HG, high glucose (120 mM); \*  $p < 0.05$ , \*\*\*  $p < 0.001$  for Kruskal-Wallis test.

(C) Quantification of MCP-1 in conditioned medium from MPMC and HPMC culture under either normal or high glucose conditions for 24 h with or without additional dapagliflozin treatment in different concentrations; \*  $p < 0.05$ , \*\*  $p < 0.01$ , \*\*\*  $p < 0.001$  for Kruskal-Wallis test.

(D) Quantification of MCP-1 and TNF- $\alpha$  in conditioned medium from murine macrophages cultured for 24 h under either normal or high glucose conditions with or without additional dapagliflozin treatment; \*  $p < 0.05$ , \*\*  $p < 0.01$ , \*\*\*  $p < 0.001$  for Kruskal-Wallis test.

**Figure 7: Dapagliflozin abrogates pro-inflammatory stimuli in murine macrophage culture.**

Quantification of MCP-1 (A), IL-6 (B) and TNF- $\alpha$  (C) in supernatants of murine macrophages under either normal or high glucose conditions with or without additional dapagliflozin treatment for 48 h and with or without subsequent stimulation with LPS for 8 h. \*\*  $p < 0.01$ , \*\*\*  $p < 0.001$  for Kruskal-Wallis test.

**Supplementary Figure 1: Systemic action of i.p. dapagliflozin.**

Chemical analysis of serum, urine and peritoneal lavage (dialysate) for sodium (Na), glucose, creatinine and urea, respectively. Presence of glucosuria as measured in 24 h urine collections demonstrates systemic dapagliflozin absorption and action in mice treated with dapagliflozin. ns, not significant; \*  $p < 0.05$ , \*\*  $p < 0.01$ , \*\*\*\*  $p < 0.0001$  for ANOVA.

**Supplementary Figure 2: Dapagliflozin does not change peritoneal transport characteristics for uremic solutes.**

Analysis of dialysate (D)-to-plasma (P) ratios as well as mass transfer area coefficients (MTAC) for creatinine and urea as surrogates of solute transport across the peritoneum. ns, not significant.

## A

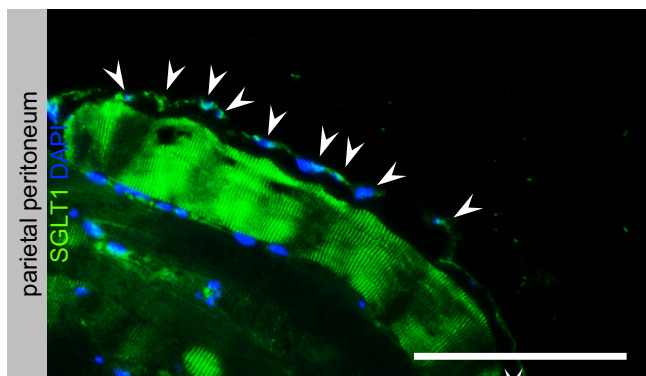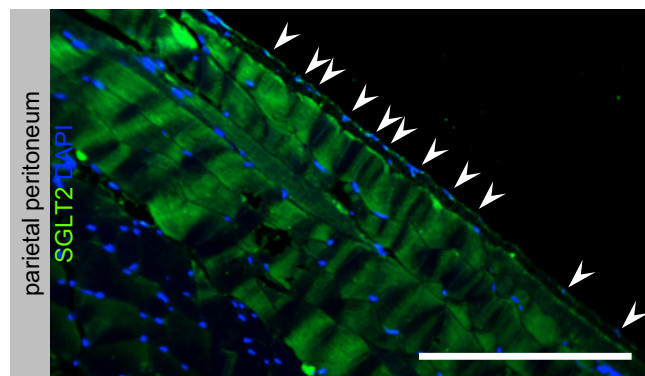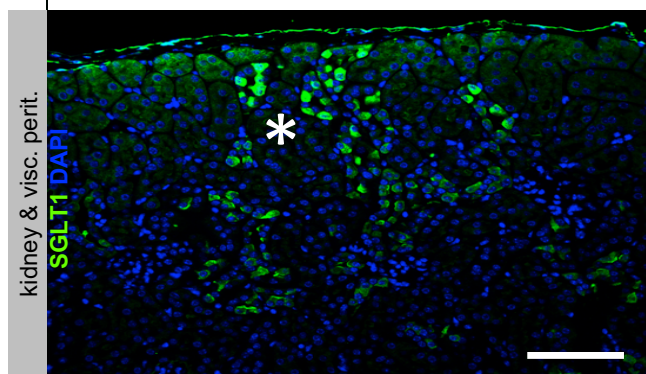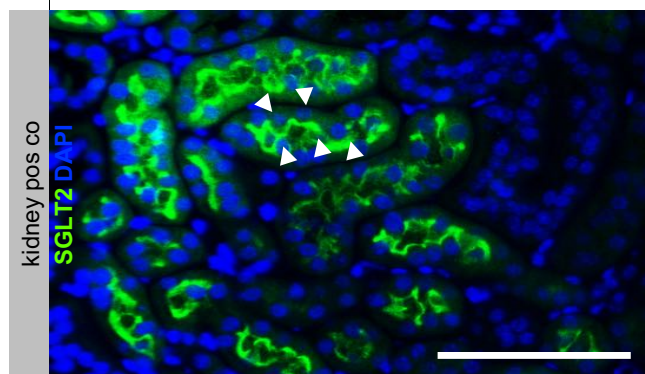

## B

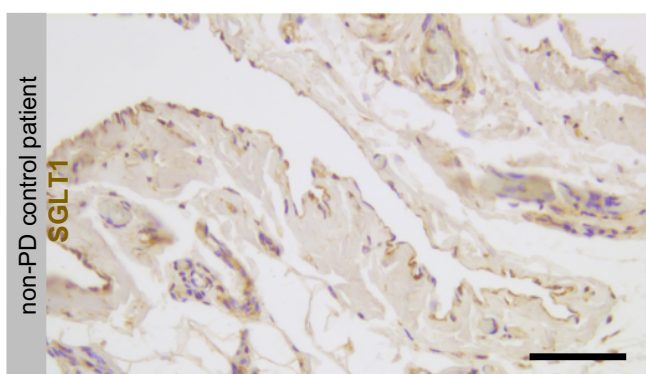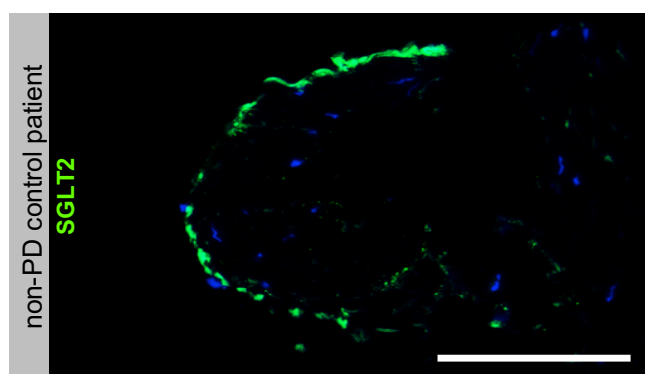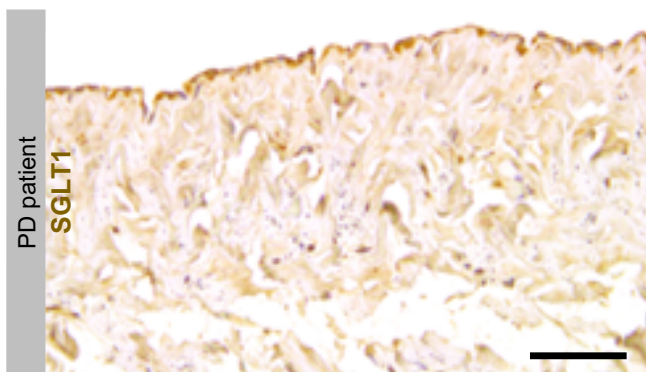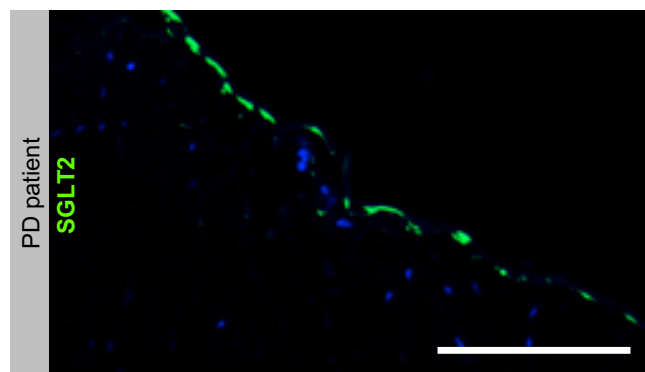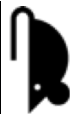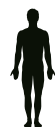



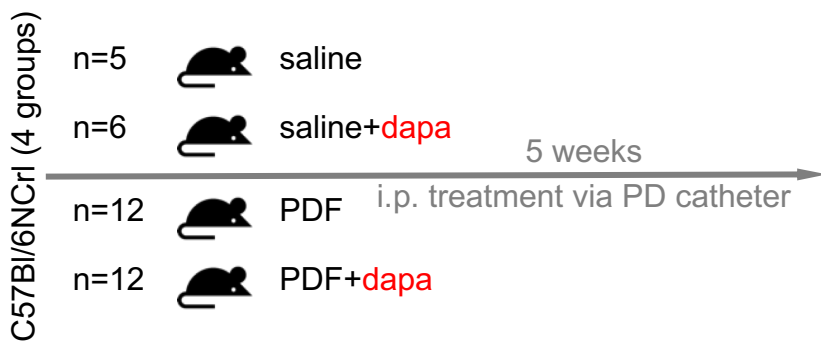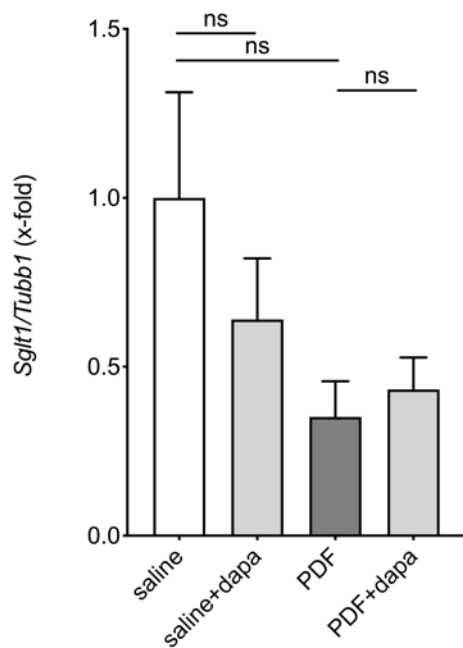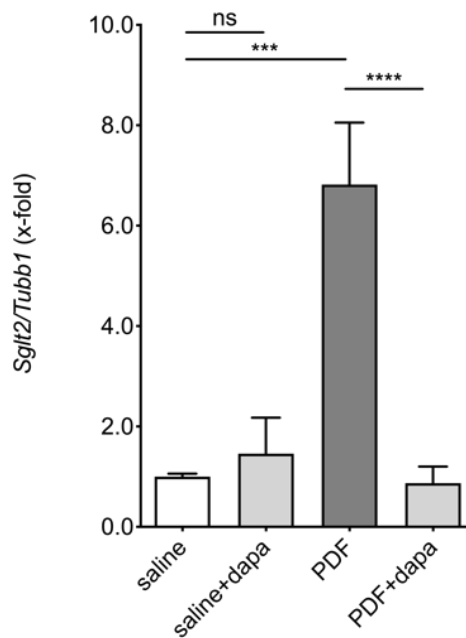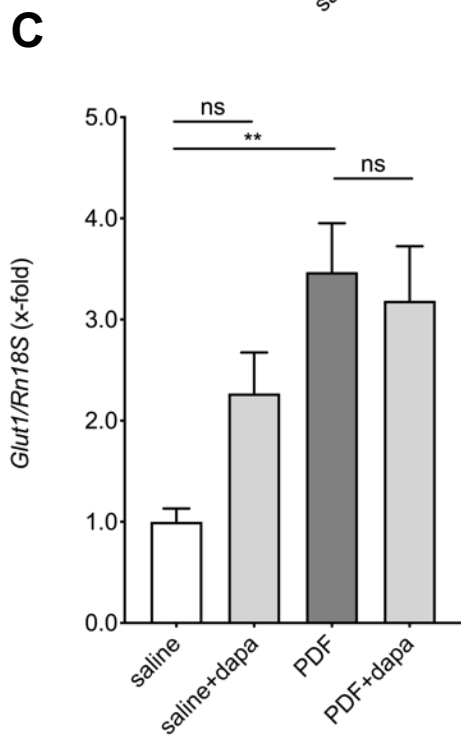

**Figure 3**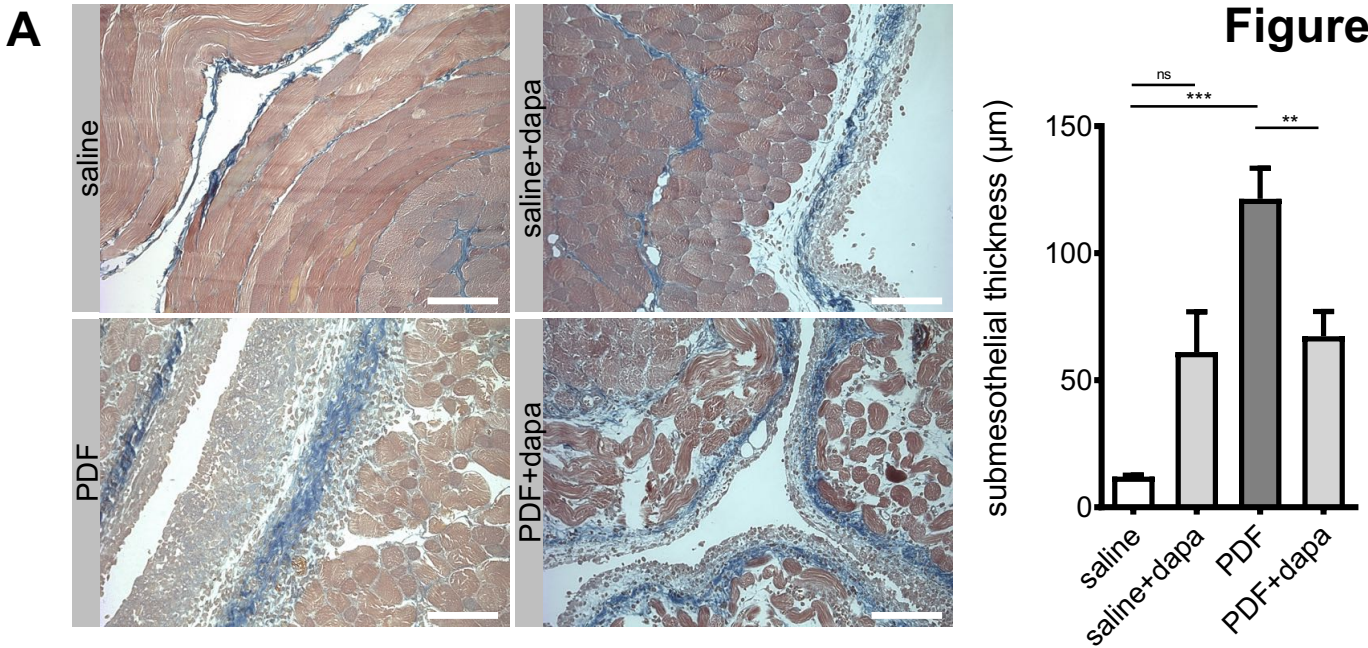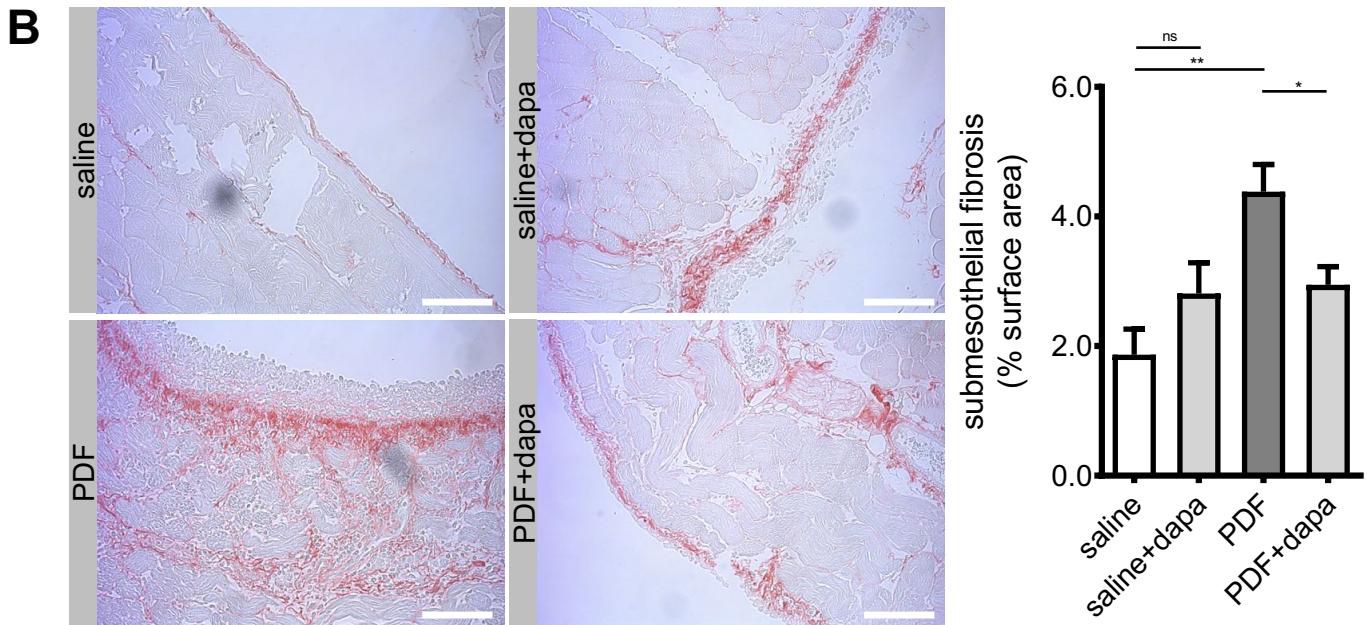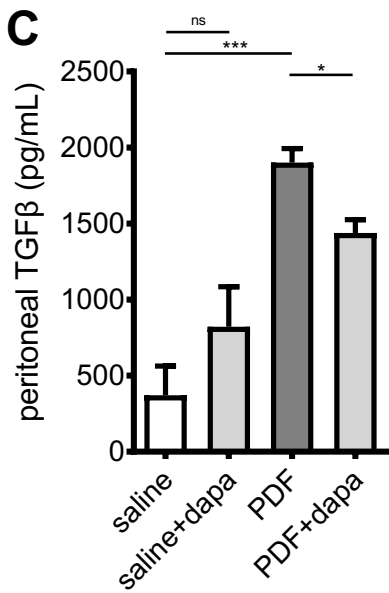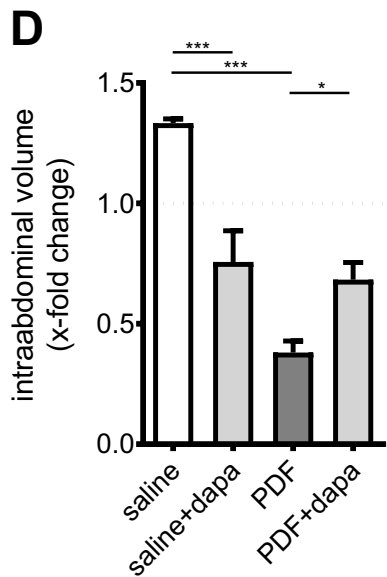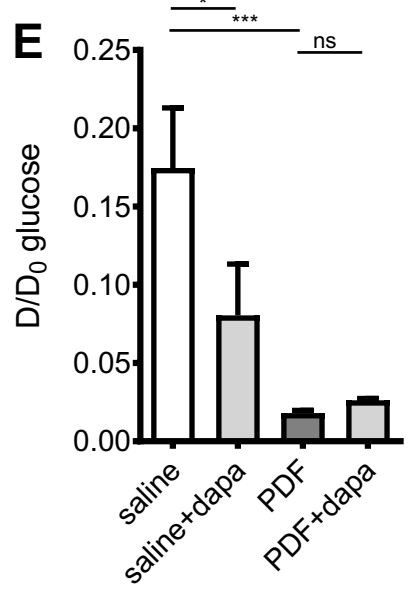

Figure 4

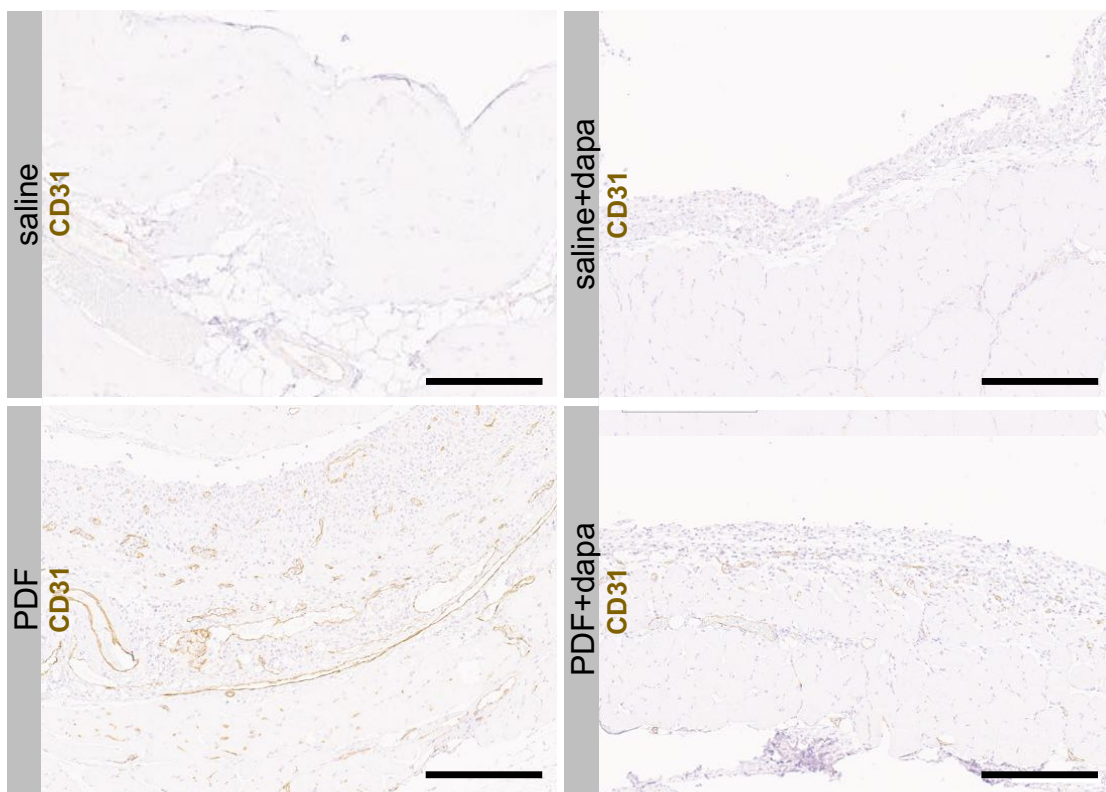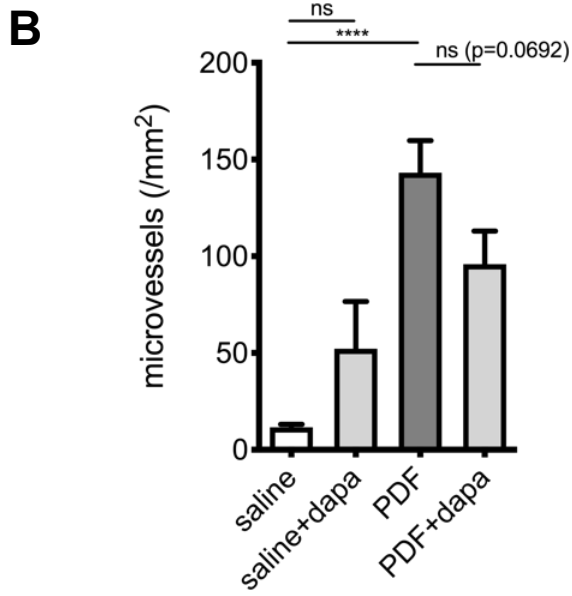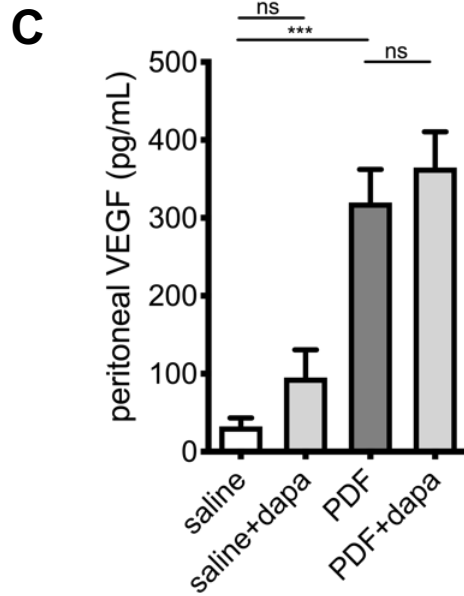

A

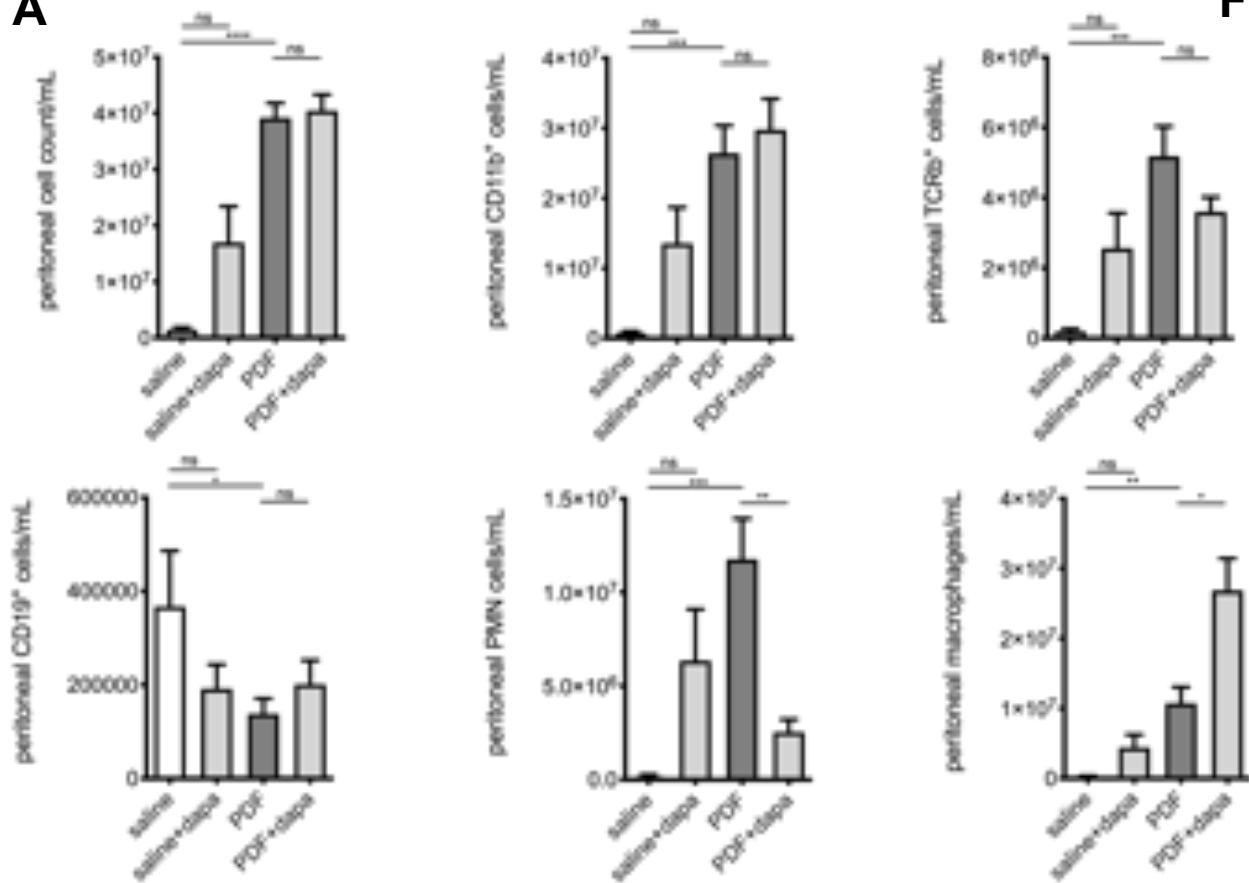

B

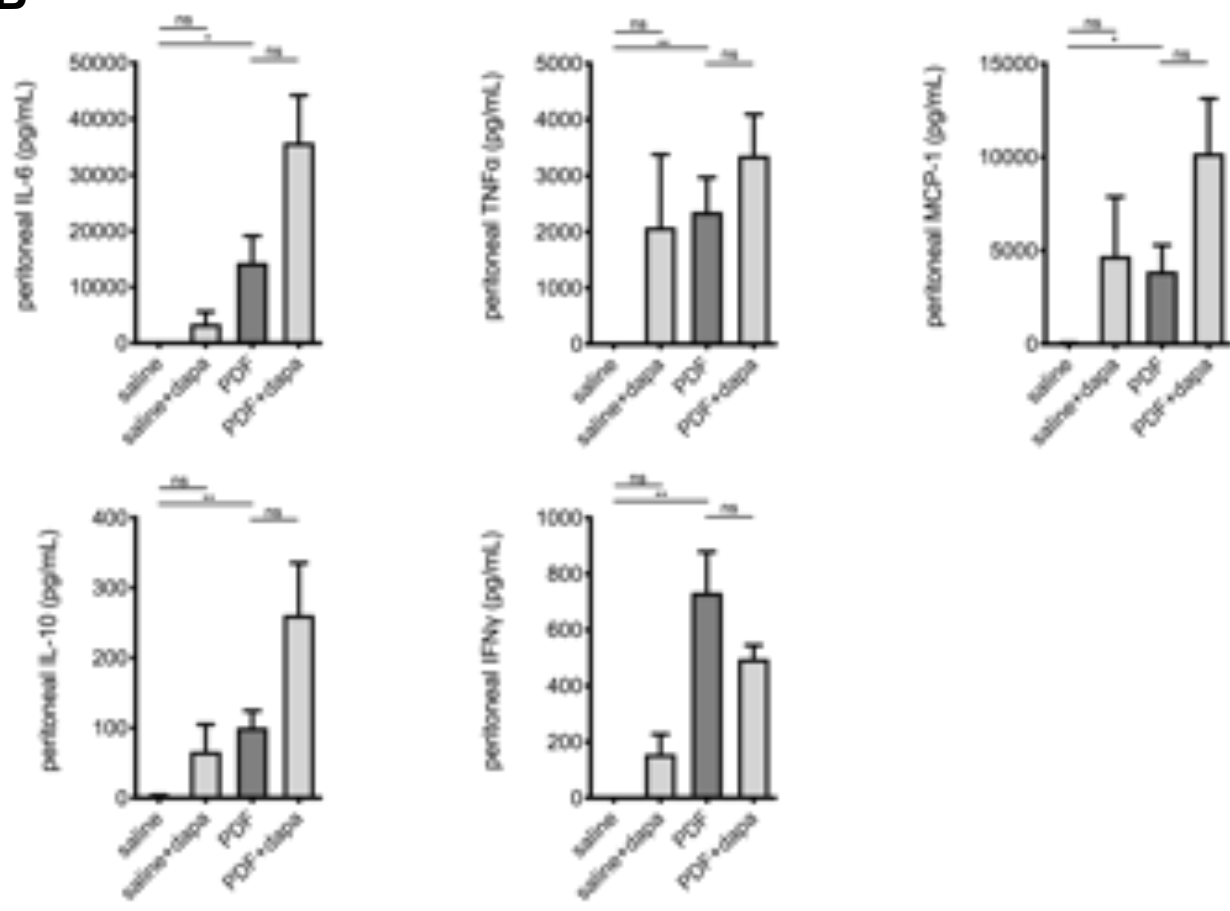

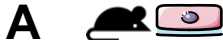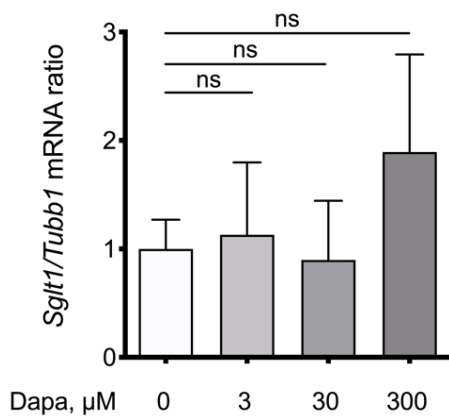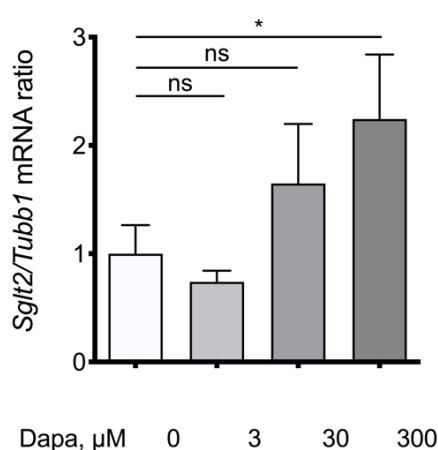

## B

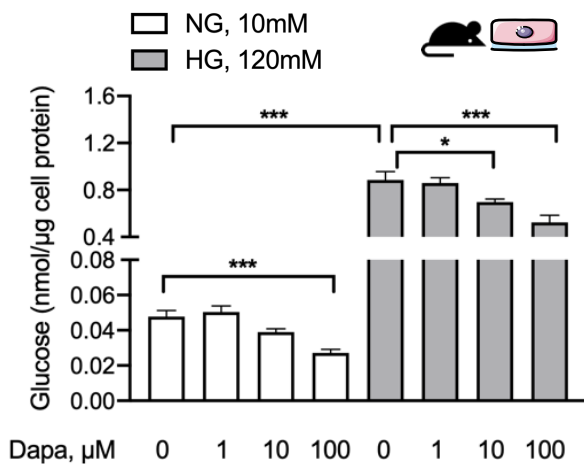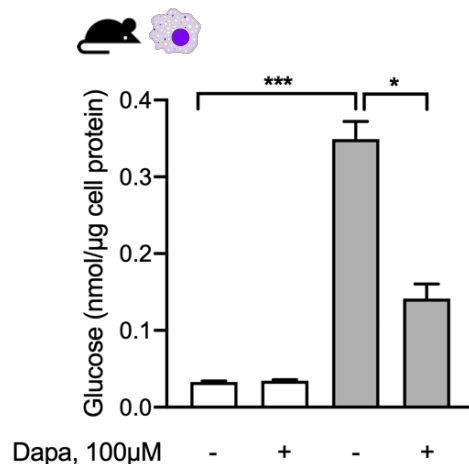

## C

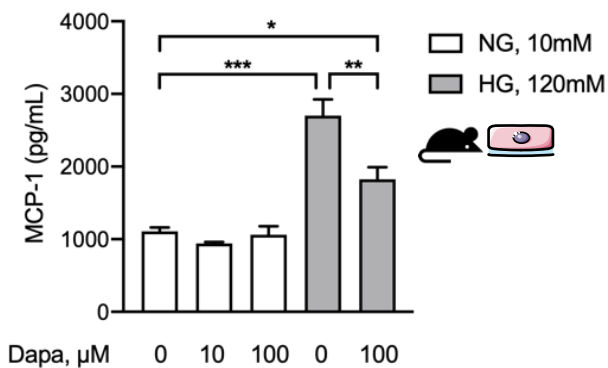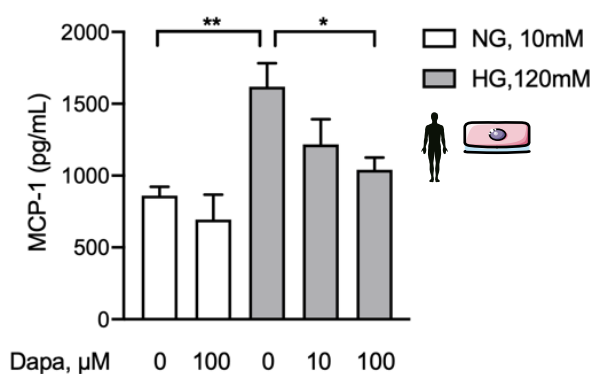

## D

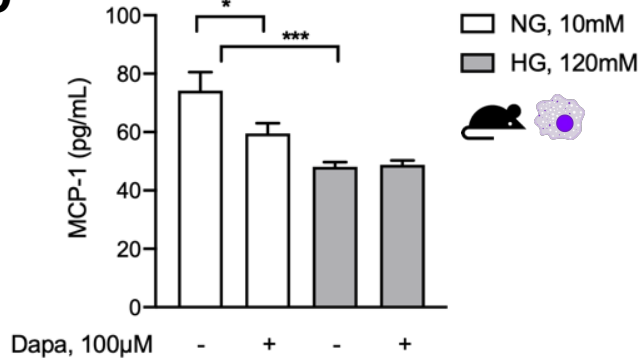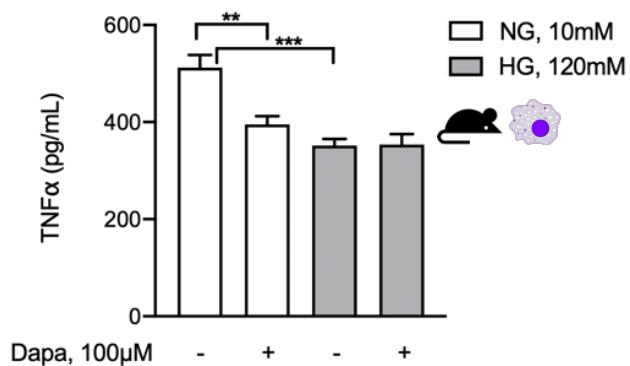

A

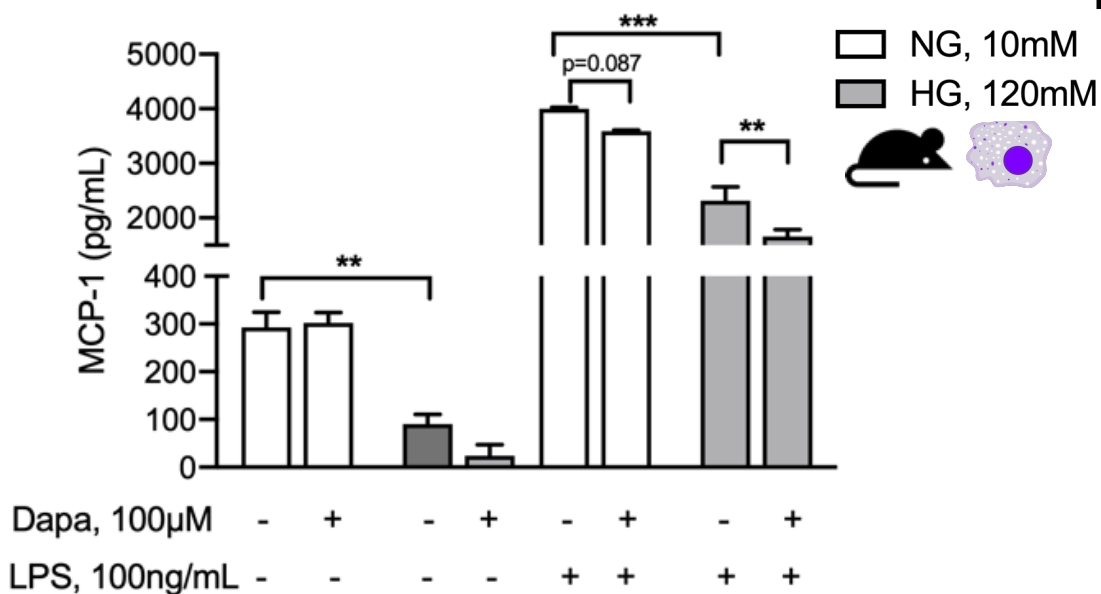

B

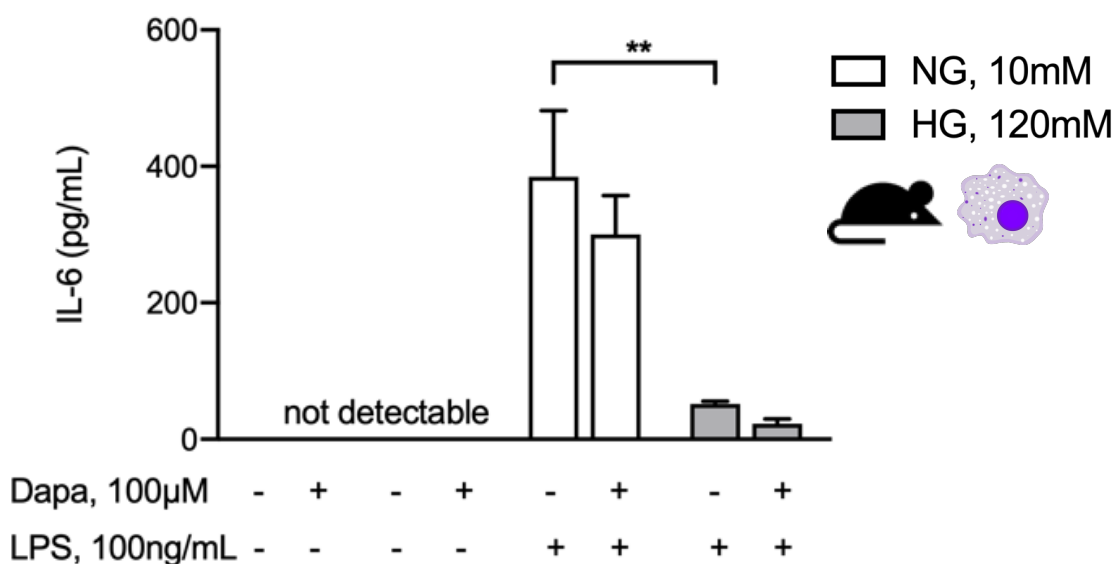

C

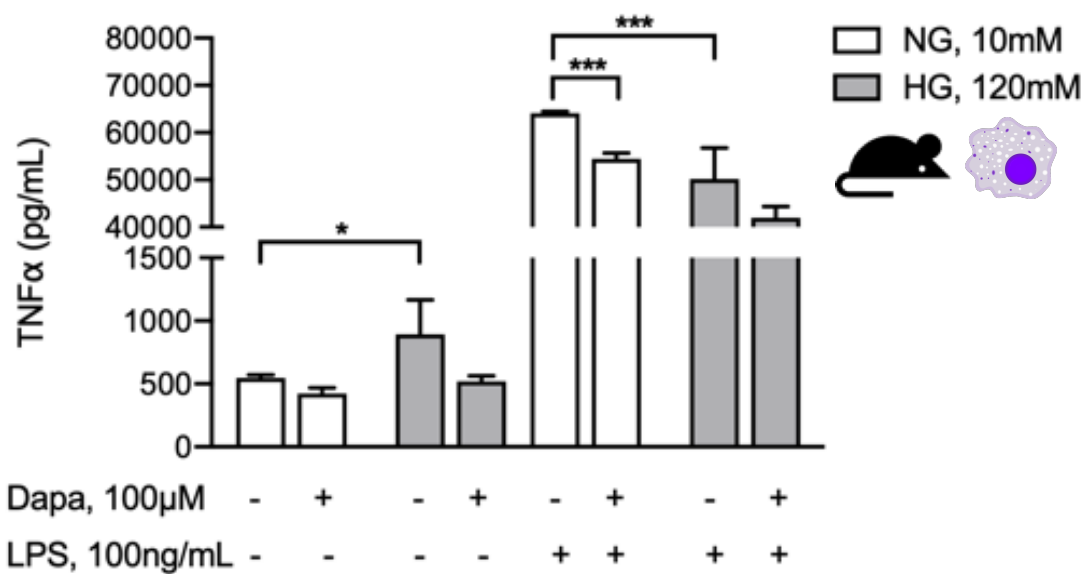

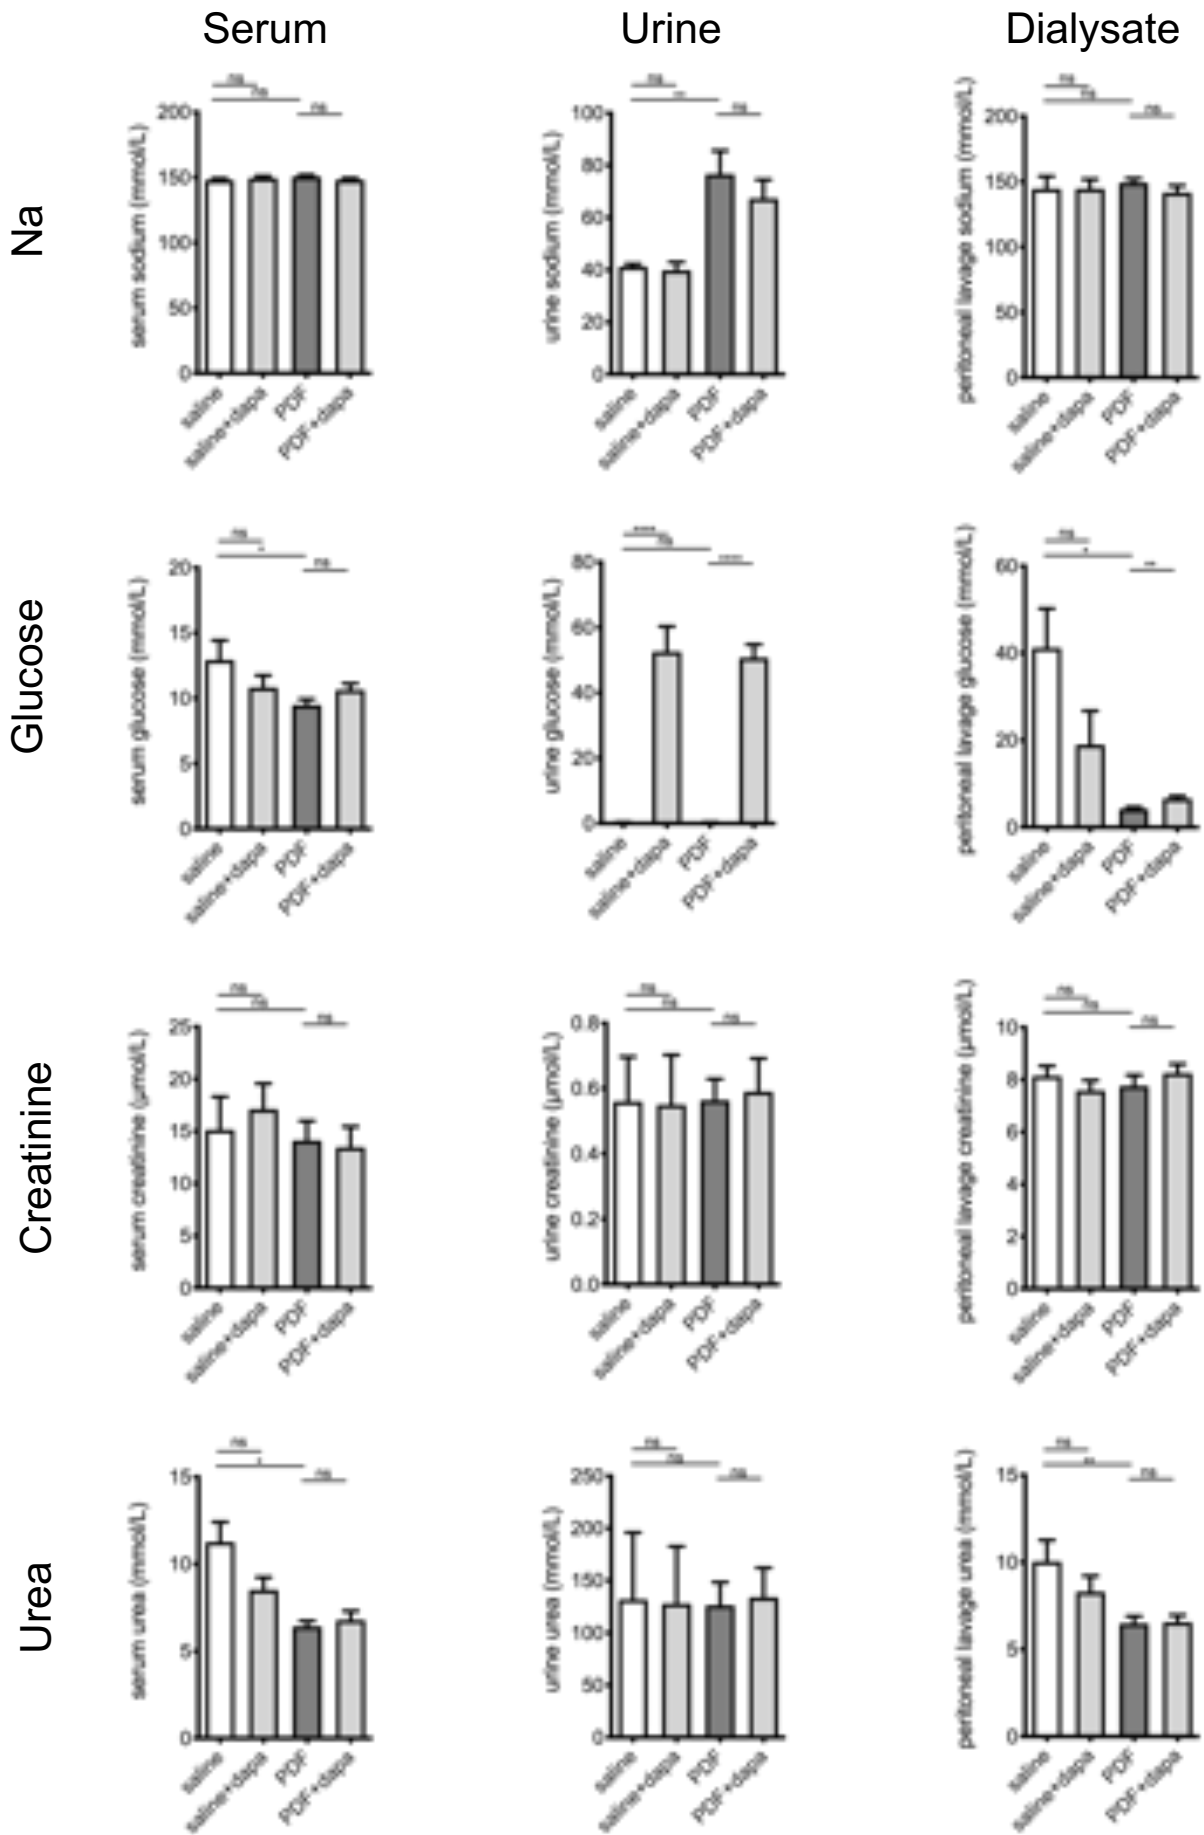

# Supplementary Figure 2

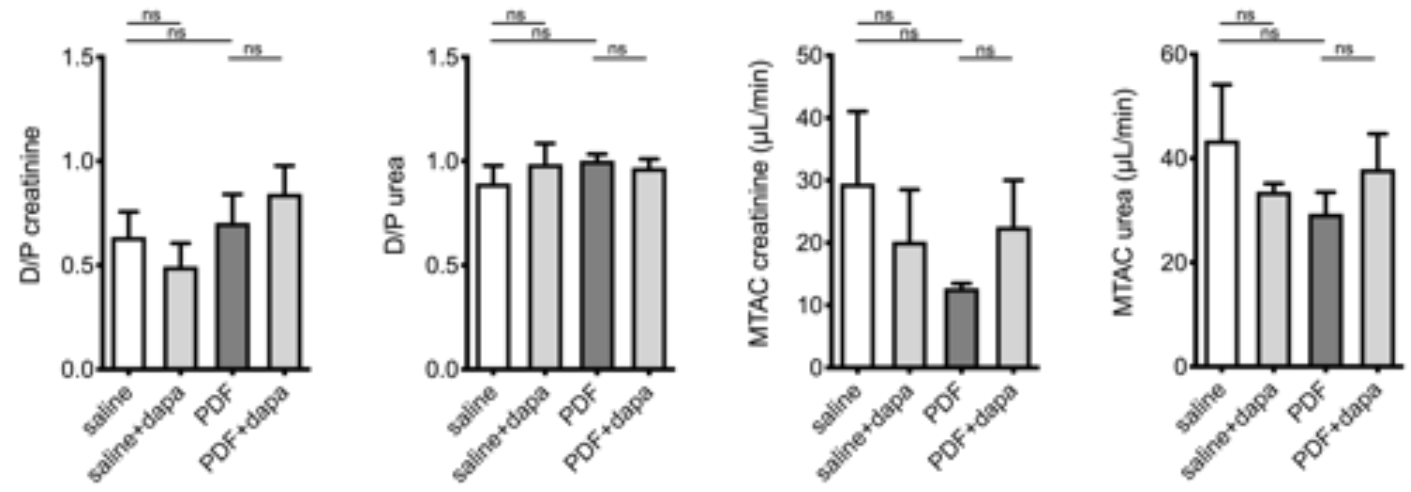

Source: http://biorxiv.org/content/10.1101/2020.11.04.366724v1.full.pdf
